# Supplementary material for: Protected Area Tourism in a Changing Climate: Will Visitation at US National Parks Warm Up or Overheat?
Source: PubMed Central journal article supplement (PMC4470629; doi:10.1371/journal.pone.0128226), 2015-06-17
Supplement: pone.0128226.s006.pdf [file pone.0128226.s006.pdf]

**S1 Table. The five individual climate models used in the representative concentration pathway (RCP) 4.5 W/m<sup>2</sup> low climate change temperature projections for each park.** These selected Coupled Model Intercomparison Project Phase 5 (CMIP5) models have the five lowest estimates of annual mean temperature out of 17 possible models for 2041-2060. Future projections were ensemble averaged across these five climate models.

| Park                                                  | Model 1   | Model 2   | Model 3   | Model 4    | Model 5    |
|-------------------------------------------------------|-----------|-----------|-----------|------------|------------|
| Abraham Lincoln Birthplace National Historic Site     | MRI-CGCM3 | INMCM4    | CNRM-CM5  | MPI-ESM-LR | GISS-E2-R  |
| Acadia National Park                                  | INMCM4    | GISS-E2-R | MRI-CGCM3 | NorESM1-M  | CCSM4      |
| Adams National Historical Park                        | INMCM4    | GISS-E2-R | MRI-CGCM3 | NorESM1-M  | BCC-CSM1-1 |
| Agate Fossil Beds National Monument                   | INMCM4    | MRI-CGCM3 | GISS-E2-R | NorESM1-M  | CCSM4      |
| Allegheny Portage Railroad National Historic Site     | INMCM4    | MRI-CGCM3 | NorESM1-M | CNRM-CM5   | GISS-E2-R  |
| Andersonville National Historical Site                | INMCM4    | MRI-CGCM3 | CNRM-CM5  | MPI-ESM-LR | NorESM1-M  |
| Antietam National Battlefield                         | INMCM4    | MRI-CGCM3 | NorESM1-M | CNRM-CM5   | MPI-ESM-LR |
| Appomattox Court House National Historical Park       | INMCM4    | MRI-CGCM3 | CNRM-CM5  | MPI-ESM-LR | GISS-E2-R  |
| Apostle Islands National Lakeshore                    | INMCM4    | MRI-CGCM3 | GISS-E2-R | NorESM1-M  | BCC-CSM1-1 |
| Arches National Park                                  | INMCM4    | MRI-CGCM3 | GISS-E2-R | BCC-CSM1-1 | MPI-ESM-LR |
| Arlington House / The Robert E. Lee National Memorial | INMCM4    | MRI-CGCM3 | CNRM-CM5  | NorESM1-M  | GISS-E2-R  |
| Assateague Island National Seashore                   | INMCM4    | MRI-CGCM3 | CNRM-CM5  | CCSM4      | MPI-ESM-LR |
| Aztec Ruins National Monument                         | INMCM4    | MRI-CGCM3 | GISS-E2-R | BCC-CSM1-1 | CCSM4      |
| Badlands National Park                                | MRI-CGCM3 | INMCM4    | GISS-E2-R | NorESM1-M  | MPI-ESM-LR |
| Bandelier National Monument                           | INMCM4    | MRI-CGCM3 | CCSM4     | GISS-E2-R  | BCC-CSM1-1 |
| Bent's Old Fort National Historic Site                | INMCM4    | MRI-CGCM3 | GISS-E2-R | NorESM1-M  | CCSM4      |
| Bighorn Canyon National Recreation Area               | INMCM4    | MRI-CGCM3 | GISS-E2-R | MPI-ESM-LR | CNRM-CM5   |

| <b>Park</b>                                       | <b>Model 1</b> | <b>Model 2</b> | <b>Model 3</b> | <b>Model 4</b> | <b>Model 5</b> |
|---------------------------------------------------|----------------|----------------|----------------|----------------|----------------|
| Big Cypress National Preserve                     | INMCM4         | MRI-CGCM3      | CNRM-CM5       | NorESM1-M      | BCC-CSM1-1     |
| Big Hole National Battlefield                     | MRI-CGCM3      | INMCM4         | GISS-E2-R      | CNRM-CM5       | MPI-ESM-LR     |
| Big South Fork National River and Recreation Area | MRI-CGCM3      | INMCM4         | CNRM-CM5       | MPI-ESM-LR     | NorESM1-M      |
| Black Canyon of the Gunnison National Park        | MRI-CGCM3      | INMCM4         | GISS-E2-R      | BCC-CSM1-1     | CNRM-CM5       |
| Blue Ridge Parkway                                | INMCM4         | MRI-CGCM3      | CNRM-CM5       | MPI-ESM-LR     | NorESM1-M      |
| Bluestone National Scenic River                   | MRI-CGCM3      | INMCM4         | CNRM-CM5       | MPI-ESM-LR     | GISS-E2-R      |
| Boston African American National Historic Site    | INMCM4         | GISS-E2-R      | MRI-CGCM3      | NorESM1-M      | BCC-CSM1-1     |
| Boston National Historical Park                   | INMCM4         | GISS-E2-R      | MRI-CGCM3      | NorESM1-M      | BCC-CSM1-1     |
| Booker T. Washington National Monument            | INMCM4         | MRI-CGCM3      | CNRM-CM5       | MPI-ESM-LR     | GISS-E2-R      |
| Bryce Canyon National Park                        | INMCM4         | MRI-CGCM3      | GISS-E2-R      | MPI-ESM-LR     | BCC-CSM1-1     |
| Buffalo National River                            | MRI-CGCM3      | INMCM4         | MIROC-ESM      | CNRM-CM5       | GISS-E2-R      |
| Canyon de Chelly National Monument                | INMCM4         | MRI-CGCM3      | GISS-E2-R      | BCC-CSM1-1     | CCSM4          |
| Castle Clinton National Monument                  | INMCM4         | MRI-CGCM3      | NorESM1-M      | GISS-E2-R      | CNRM-CM5       |
| Cape Cod National Seashore                        | INMCM4         | GISS-E2-R      | CCSM4          | NorESM1-M      | MRI-CGCM3      |
| Casa Grande Ruins National Monument               | INMCM4         | MRI-CGCM3      | GISS-E2-R      | BCC-CSM1-1     | CNRM-CM5       |
| Cape Hatteras National Seashore                   | INMCM4         | MRI-CGCM3      | CNRM-CM5       | MPI-ESM-LR     | NorESM1-M      |
| Cape Lookout National Seashore                    | INMCM4         | MRI-CGCM3      | CNRM-CM5       | MPI-ESM-LR     | ACCESS1-0      |
| Canyonlands National Park                         | INMCM4         | MRI-CGCM3      | GISS-E2-R      | BCC-CSM1-1     | MPI-ESM-LR     |
| Capitol Reef National Park                        | INMCM4         | MRI-CGCM3      | GISS-E2-R      | MPI-ESM-LR     | BCC-CSM1-1     |
| Carl Sandburg Home National Historic Site         | INMCM4         | MRI-CGCM3      | CNRM-CM5       | MPI-ESM-LR     | NorESM1-M      |
| Catoctin Mountain Park                            | INMCM4         | MRI-CGCM3      | NorESM1-M      | CNRM-CM5       | GISS-E2-R      |

| Park                                                   | Model 1   | Model 2    | Model 3    | Model 4        | Model 5    |
|--------------------------------------------------------|-----------|------------|------------|----------------|------------|
| Carlsbad Caverns National Park                         | INMCM4    | MRI-CGCM3  | BCC-CSM1-1 | CCSM4          | GISS-E2-R  |
| Capulin Volcano National Monument                      | INMCM4    | MRI-CGCM3  | CCSM4      | GISS-E2-R      | MPI-ESM-LR |
| Cedar Breaks National Monument                         | INMCM4    | MRI-CGCM3  | GISS-E2-R  | MPI-ESM-LR     | BCC-CSM1-1 |
| Chamizal National Memorial                             | INMCM4    | MRI-CGCM3  | BCC-CSM1-1 | CCSM4          | GISS-E2-R  |
| Chattahoochee River National Recreation Area           | INMCM4    | MRI-CGCM3  | CNRM-CM5   | MPI-ESM-LR     | NorESM1-M  |
| Chickamauga and Chattanooga National Military Park     | INMCM4    | MRI-CGCM3  | CNRM-CM5   | MPI-ESM-LR     | GISS-E2-R  |
| Chaco Culture National Historical Park                 | INMCM4    | MRI-CGCM3  | GISS-E2-R  | BCC-CSM1-1     | CCSM4      |
| Chickasaw National Recreation Area                     | INMCM4    | MRI-CGCM3  | GISS-E2-R  | CCSM4          | CNRM-CM5   |
| Channel Islands National Park                          | INMCM4    | MRI-CGCM3  | GISS-E2-R  | HadGEM2-CC     | CCSM4      |
| Chesapeake and Ohio Canal National Historic Park       | INMCM4    | MRI-CGCM3  | NorESM1-M  | CNRM-CM5       | MPI-ESM-LR |
| Charles Pinckney National Historic Site                | INMCM4    | MRI-CGCM3  | CNRM-CM5   | MPI-ESM-LR     | BCC-CSM1-1 |
| Christiansted National Historic Site                   | INMCM4    | BCC-CSM1-1 | CNRM-CM5   | MRI-CGCM3      | CCSM4      |
| Little Rock Central High School National Historic Site | INMCM4    | MRI-CGCM3  | MIROC-ESM  | CNRM-CM5       | MPI-ESM-LR |
| City of Rocks National Reserve                         | MRI-CGCM3 | INMCM4     | GISS-E2-R  | MPI-ESM-LR     | BCC-CSM1-1 |
| Colorado National Monument                             | INMCM4    | MRI-CGCM3  | GISS-E2-R  | BCC-CSM1-1     | CNRM-CM5   |
| Colonial National Historical Park                      | INMCM4    | MRI-CGCM3  | CNRM-CM5   | NorESM1-M      | CCSM4      |
| Congaree National Park                                 | INMCM4    | MRI-CGCM3  | CNRM-CM5   | MIROC-ESM-CHEM | MPI-ESM-LR |
| Cowpens National Battlefield                           | INMCM4    | MRI-CGCM3  | CNRM-CM5   | MPI-ESM-LR     | GISS-E2-R  |
| Crater Lake National Park                              | INMCM4    | MRI-CGCM3  | GISS-E2-R  | MIROC5         | CNRM-CM5   |

| Park                                              | Model 1   | Model 2   | Model 3    | Model 4    | Model 5    |
|---------------------------------------------------|-----------|-----------|------------|------------|------------|
| Craters of the Moon National Monument             | MRI-CGCM3 | INMCM4    | GISS-E2-R  | MPI-ESM-LR | CNRM-CM5   |
| Cumberland Gap National Historical Park           | MRI-CGCM3 | INMCM4    | CNRM-CM5   | MPI-ESM-LR | NorESM1-M  |
| Curecanti National Recreation Area                | MRI-CGCM3 | INMCM4    | GISS-E2-R  | MPI-ESM-LR | CNRM-CM5   |
| Cuyahoga Valley National Park                     | INMCM4    | MRI-CGCM3 | NorESM1-M  | CCSM4      | MPI-ESM-LR |
| Dayton Aviation Heritage National Historical Park | INMCM4    | MRI-CGCM3 | GISS-E2-R  | MPI-ESM-LR | NorESM1-M  |
| Denali National Park & Preserve                   | MRI-CGCM3 | INMCM4    | GISS-E2-R  | MIROC5     | BCC-CSM1-1 |
| Devils Postpile National Monument                 | INMCM4    | MRI-CGCM3 | GISS-E2-R  | BCC-CSM1-1 | CCSM4      |
| Devils Tower National Monument                    | MRI-CGCM3 | INMCM4    | GISS-E2-R  | MPI-ESM-LR | NorESM1-M  |
| Death Valley National Park                        | INMCM4    | MRI-CGCM3 | GISS-E2-R  | CNRM-CM5   | MPI-ESM-LR |
| Delaware Water Gap National Recreation Area       | INMCM4    | MRI-CGCM3 | NorESM1-M  | CNRM-CM5   | GISS-E2-R  |
| Dinosaur National Monument                        | MRI-CGCM3 | INMCM4    | GISS-E2-R  | CNRM-CM5   | BCC-CSM1-1 |
| Edison National Historic Site                     | INMCM4    | MRI-CGCM3 | NorESM1-M  | GISS-E2-R  | CNRM-CM5   |
| Effigy Mounds National Monument                   | MRI-CGCM3 | INMCM4    | CNRM-CM5   | GISS-E2-R  | BCC-CSM1-1 |
| Eisenhower National Historic Site                 | INMCM4    | MRI-CGCM3 | NorESM1-M  | CNRM-CM5   | GISS-E2-R  |
| El Malpais National Monument                      | INMCM4    | MRI-CGCM3 | CCSM4      | GISS-E2-R  | BCC-CSM1-1 |
| El Morro National Monument                        | INMCM4    | MRI-CGCM3 | BCC-CSM1-1 | CCSM4      | GISS-E2-R  |
| Eleanor Roosevelt National Historic Site          | INMCM4    | MRI-CGCM3 | GISS-E2-R  | NorESM1-M  | CNRM-CM5   |
| Everglades National Park                          | INMCM4    | MRI-CGCM3 | CNRM-CM5   | NorESM1-M  | BCC-CSM1-1 |
| Federal Hall National Memorial                    | INMCM4    | MRI-CGCM3 | NorESM1-M  | GISS-E2-R  | CNRM-CM5   |
| Fire Island National Seashore                     | INMCM4    | GISS-E2-R | NorESM1-M  | MRI-CGCM3  | BCC-CSM1-1 |
| Florissant Fossil Beds National Monument          | INMCM4    | MRI-CGCM3 | GISS-E2-R  | CCSM4      | MPI-ESM-LR |

| <b>Park</b>                                        | <b>Model 1</b> | <b>Model 2</b> | <b>Model 3</b> | <b>Model 4</b> | <b>Model 5</b> |
|----------------------------------------------------|----------------|----------------|----------------|----------------|----------------|
| Fort Bowie National Historic Site                  | INMCM4         | MRI-CGCM3      | BCC-CSM1-1     | GISS-E2-R      | CCSM4          |
| Fossil Butte National Monument                     | MRI-CGCM3      | INMCM4         | GISS-E2-R      | CNRM-CM5       | BCC-CSM1-1     |
| Fort Caroline National Memorial                    | INMCM4         | MRI-CGCM3      | CNRM-CM5       | MPI-ESM-LR     | NorESM1-M      |
| Fort Donelson National Battlefield                 | MRI-CGCM3      | INMCM4         | CNRM-CM5       | MPI-ESM-LR     | GISS-E2-R      |
| Fort Laramie National Historic Site                | INMCM4         | MRI-CGCM3      | GISS-E2-R      | MPI-ESM-LR     | NorESM1-M      |
| Fort Larned National Historic Site                 | INMCM4         | MRI-CGCM3      | GISS-E2-R      | CNRM-CM5       | NorESM1-M      |
| Fort Matanzas National Monument                    | INMCM4         | MRI-CGCM3      | CNRM-CM5       | NorESM1-M      | BCC-CSM1-1     |
| Fort McHenry National Monument and Historic Shrine | INMCM4         | MRI-CGCM3      | CNRM-CM5       | NorESM1-M      | GISS-E2-R      |
| Fort Necessity National Battlefield                | MRI-CGCM3      | INMCM4         | NorESM1-M      | CNRM-CM5       | GISS-E2-R      |
| Fort Point National Historic Site                  | MRI-CGCM3      | INMCM4         | GISS-E2-R      | HadGEM2-CC     | CCSM4          |
| Fort Raleigh National Historical Site              | INMCM4         | MRI-CGCM3      | CNRM-CM5       | MPI-ESM-LR     | NorESM1-M      |
| Fort Scott National Historic Site                  | MRI-CGCM3      | INMCM4         | CNRM-CM5       | GISS-E2-R      | CCSM4          |
| Fort Smith National Historic Site                  | INMCM4         | MRI-CGCM3      | MIROC-ESM      | CNRM-CM5       | GISS-E2-R      |
| Fort Stanwix National Monument                     | INMCM4         | MRI-CGCM3      | CNRM-CM5       | GISS-E2-R      | NorESM1-M      |
| Fort Sumter National Monument                      | INMCM4         | MRI-CGCM3      | CNRM-CM5       | MPI-ESM-LR     | BCC-CSM1-1     |
| Fort Union National Monument                       | INMCM4         | MRI-CGCM3      | CCSM4          | GISS-E2-R      | BCC-CSM1-1     |
| Fort Union Trading Post National Historic Site     | INMCM4         | MRI-CGCM3      | GISS-E2-R      | BCC-CSM1-1     | CNRM-CM5       |
| Fort Vancouver National Historic Site              | INMCM4         | GISS-E2-R      | MRI-CGCM3      | CNRM-CM5       | MIROC5         |
| Fort Washington Park                               | INMCM4         | MRI-CGCM3      | CNRM-CM5       | NorESM1-M      | GISS-E2-R      |
| Friendship Hill National Historic Site             | MRI-CGCM3      | INMCM4         | NorESM1-M      | CNRM-CM5       | GISS-E2-R      |

| <b>Park</b>                                            | <b>Model 1</b> | <b>Model 2</b> | <b>Model 3</b> | <b>Model 4</b> | <b>Model 5</b> |
|--------------------------------------------------------|----------------|----------------|----------------|----------------|----------------|
| Fredericksburg and Spotsylvania National Military Park | INMCM4         | MRI-CGCM3      | CNRM-CM5       | NorESM1-M      | MPI-ESM-LR     |
| Gateway National Recreation Area                       | INMCM4         | MRI-CGCM3      | NorESM1-M      | GISS-E2-R      | CNRM-CM5       |
| General Grant National Memorial                        | INMCM4         | MRI-CGCM3      | GISS-E2-R      | NorESM1-M      | CNRM-CM5       |
| Gettysburg National Military Park                      | INMCM4         | MRI-CGCM3      | NorESM1-M      | CNRM-CM5       | GISS-E2-R      |
| George Washington Birthplace National Monument         | INMCM4         | MRI-CGCM3      | CNRM-CM5       | NorESM1-M      | CCSM4          |
| Gila Cliff Dwellings National Monument                 | INMCM4         | MRI-CGCM3      | BCC-CSM1-1     | CCSM4          | GISS-E2-R      |
| Glacier National Park                                  | INMCM4         | MRI-CGCM3      | GISS-E2-R      | CNRM-CM5       | MPI-ESM-LR     |
| Glacier Bay National Park & Preserve                   | GISS-E2-R      | INMCM4         | MRI-CGCM3      | MIROC5         | HadGEM2-CC     |
| Glen Canyon National Recreation Area                   | INMCM4         | MRI-CGCM3      | GISS-E2-R      | MPI-ESM-LR     | BCC-CSM1-1     |
| Golden Gate National Recreation Area                   | INMCM4         | MRI-CGCM3      | GISS-E2-R      | HadGEM2-CC     | CCSM4          |
| Governors Island National Monument                     | INMCM4         | MRI-CGCM3      | NorESM1-M      | GISS-E2-R      | CNRM-CM5       |
| Golden Spike National Historic Site                    | MRI-CGCM3      | INMCM4         | GISS-E2-R      | BCC-CSM1-1     | MPI-ESM-LR     |
| Great Basin National Park                              | INMCM4         | MRI-CGCM3      | GISS-E2-R      | MPI-ESM-LR     | BCC-CSM1-1     |
| Grand Canyon National Park                             | INMCM4         | MRI-CGCM3      | GISS-E2-R      | MPI-ESM-LR     | CCSM4          |
| Greenbelt Park                                         | INMCM4         | MRI-CGCM3      | CNRM-CM5       | NorESM1-M      | GISS-E2-R      |
| Grant-Kohrs Ranch National Historic Site               | INMCM4         | MRI-CGCM3      | GISS-E2-R      | CNRM-CM5       | MPI-ESM-LR     |
| Grand Portage National Monument                        | INMCM4         | MRI-CGCM3      | GISS-E2-R      | NorESM1-M      | BCC-CSM1-1     |
| Great Sand Dunes National Park                         | MRI-CGCM3      | INMCM4         | GISS-E2-R      | CCSM4          | MPI-ESM-LR     |
| Great Smoky Mountains National Park                    | INMCM4         | MRI-CGCM3      | CNRM-CM5       | MPI-ESM-LR     | NorESM1-M      |
| Grand Teton National Park                              | MRI-CGCM3      | INMCM4         | GISS-E2-R      | CNRM-CM5       | MPI-ESM-LR     |

| <b>Park</b>                                          | <b>Model 1</b> | <b>Model 2</b> | <b>Model 3</b> | <b>Model 4</b> | <b>Model 5</b> |
|------------------------------------------------------|----------------|----------------|----------------|----------------|----------------|
| Guilford Courthouse National Military Park           | INMCM4         | MRI-CGCM3      | CNRM-CM5       | MPI-ESM-LR     | NorESM1-M      |
| Gulf Islands National Seashore                       | INMCM4         | MRI-CGCM3      | CNRM-CM5       | NorESM1-M      | MPI-ESM-LR     |
| Guadalupe Mountains National Park                    | INMCM4         | MRI-CGCM3      | BCC-CSM1-1     | GISS-E2-R      | CCSM4          |
| George Washington Carver National Monument           | MRI-CGCM3      | INMCM4         | CNRM-CM5       | GISS-E2-R      | MIROC-ESM      |
| George Washington Memorial Parkway                   | INMCM4         | MRI-CGCM3      | CNRM-CM5       | NorESM1-M      | GISS-E2-R      |
| Harpers Ferry National Historical Park               | INMCM4         | MRI-CGCM3      | CNRM-CM5       | MPI-ESM-LR     | NorESM1-M      |
| Hagerman Fossil Beds National Monument               | INMCM4         | MRI-CGCM3      | GISS-E2-R      | MPI-ESM-LR     | BCC-CSM1-1     |
| Hamilton Grange National Memorial                    | INMCM4         | MRI-CGCM3      | GISS-E2-R      | NorESM1-M      | CNRM-CM5       |
| Haleakala National Park                              | INMCM4         | MRI-CGCM3      | GISS-E2-R      | ACCESS1-0      | CNRM-CM5       |
| Hawai'i Volcanoes National Park                      | INMCM4         | MRI-CGCM3      | GISS-E2-R      | MIROC5         | CNRM-CM5       |
| Herbert Hoover National Historic Site                | MRI-CGCM3      | INMCM4         | CNRM-CM5       | GISS-E2-R      | MPI-ESM-LR     |
| Horseshoe Bend National Military Park                | INMCM4         | MRI-CGCM3      | CNRM-CM5       | MPI-ESM-LR     | GISS-E2-R      |
| Hopewell Culture National Historical Park            | INMCM4         | MRI-CGCM3      | NorESM1-M      | MPI-ESM-LR     | CNRM-CM5       |
| Home of Franklin D. Roosevelt National Historic Site | INMCM4         | MRI-CGCM3      | GISS-E2-R      | NorESM1-M      | CNRM-CM5       |
| Hopewell Furnace National Historic Site              | INMCM4         | MRI-CGCM3      | NorESM1-M      | CNRM-CM5       | GISS-E2-R      |
| Homestead National Monument                          | MRI-CGCM3      | INMCM4         | GISS-E2-R      | CNRM-CM5       | CCSM4          |
| Hot Springs National Park                            | INMCM4         | MRI-CGCM3      | MIROC-ESM      | CNRM-CM5       | MPI-ESM-LR     |
| Hovenweep National Monument                          | INMCM4         | MRI-CGCM3      | GISS-E2-R      | BCC-CSM1-1     | CNRM-CM5       |
| Harry S. Truman National Historic Site               | MRI-CGCM3      | INMCM4         | CNRM-CM5       | GISS-E2-R      | CCSM4          |
| Hubbell Trading Post National Historic Site          | INMCM4         | MRI-CGCM3      | GISS-E2-R      | BCC-CSM1-1     | CCSM4          |

| Park                                               | Model 1   | Model 2   | Model 3   | Model 4    | Model 5        |
|----------------------------------------------------|-----------|-----------|-----------|------------|----------------|
| Independence National Historical Park              | INMCM4    | MRI-CGCM3 | NorESM1-M | GISS-E2-R  | CNRM-CM5       |
| Indiana Dunes National Lakeshore                   | INMCM4    | MRI-CGCM3 | CNRM-CM5  | NorESM1-M  | GISS-E2-R      |
| Isle Royale National Park                          | INMCM4    | MRI-CGCM3 | GISS-E2-R | NorESM1-M  | CCSM4          |
| James A Garfield National Historic Site            | INMCM4    | MRI-CGCM3 | NorESM1-M | CCSM4      | CNRM-CM5       |
| Jewel Cave National Monument                       | INMCM4    | MRI-CGCM3 | GISS-E2-R | MPI-ESM-LR | NorESM1-M      |
| Jefferson National Expansion Memorial              | MRI-CGCM3 | INMCM4    | CNRM-CM5  | GISS-E2-R  | CCSM4          |
| Jimmy Carter National Historic Site                | INMCM4    | MRI-CGCM3 | CNRM-CM5  | MPI-ESM-LR | NorESM1-M      |
| John Day Fossil Beds National Monument             | INMCM4    | MRI-CGCM3 | GISS-E2-R | MPI-ESM-LR | MIROC5         |
| John D. Rockefeller, Jr. Memorial Parkway          | MRI-CGCM3 | INMCM4    | GISS-E2-R | CNRM-CM5   | MPI-ESM-LR     |
| John Fitzgerald Kennedy National Historic Site     | INMCM4    | GISS-E2-R | MRI-CGCM3 | NorESM1-M  | BCC-CSM1-1     |
| Johnstown Flood National Memorial                  | INMCM4    | MRI-CGCM3 | NorESM1-M | CNRM-CM5   | GISS-E2-R      |
| Joshua Tree National Park                          | INMCM4    | MRI-CGCM3 | GISS-E2-R | MPI-ESM-LR | CNRM-CM5       |
| Katmai National Park & Preserve                    | MIROC5    | MRI-CGCM3 | INMCM4    | GISS-E2-R  | MIROC-ESM-CHEM |
| Kenai Fjords National Park                         | MRI-CGCM3 | MIROC5    | GISS-E2-R | INMCM4     | CNRM-CM5       |
| Kennesaw Mountain National Battlefield Park        | INMCM4    | MRI-CGCM3 | CNRM-CM5  | MPI-ESM-LR | GISS-E2-R      |
| Kings Canyon National Park                         | INMCM4    | MRI-CGCM3 | GISS-E2-R | BCC-CSM1-1 | MPI-ESM-LR     |
| Kings Mountain National Military Park              | INMCM4    | MRI-CGCM3 | CNRM-CM5  | MPI-ESM-LR | GISS-E2-R      |
| Klondike Gold Rush AK National Historical Park     | MRI-CGCM3 | GISS-E2-R | INMCM4    | CNRM-CM5   | MIROC5         |
| Klondike Gold Rush WA National Historical Park     | INMCM4    | MRI-CGCM3 | GISS-E2-R | CNRM-CM5   | MIROC5         |
| Knife River Indian Villages National Historic Site | MRI-CGCM3 | INMCM4    | GISS-E2-R | BCC-CSM1-1 | CNRM-CM5       |



| Park                                                                  | Model 1   | Model 2   | Model 3   | Model 4    | Model 5    |
|-----------------------------------------------------------------------|-----------|-----------|-----------|------------|------------|
| Korean War Veterans Memorial National Memorial                        | INMCM4    | MRI-CGCM3 | CNRM-CM5  | NorESM1-M  | GISS-E2-R  |
| Lava Beds National Monument                                           | INMCM4    | MRI-CGCM3 | GISS-E2-R | MIROC5     | BCC-CSM1-1 |
| Lake Chelan National Recreation Area                                  | INMCM4    | MRI-CGCM3 | GISS-E2-R | MIROC5     | CNRM-CM5   |
| Lake Clark National Park & Preserve                                   | MRI-CGCM3 | GISS-E2-R | MIROC5    | INMCM4     | BCC-CSM1-1 |
| Lake Mead National Recreation Area                                    | INMCM4    | MRI-CGCM3 | GISS-E2-R | MPI-ESM-LR | CNRM-CM5   |
| Lake Meredith National Recreation Area                                | INMCM4    | MRI-CGCM3 | GISS-E2-R | CCSM4      | CNRM-CM5   |
| Lake Roosevelt National Recreation Area                               | INMCM4    | GISS-E2-R | MRI-CGCM3 | MIROC5     | CNRM-CM5   |
| Lassen Volcanic National Park                                         | INMCM4    | MRI-CGCM3 | GISS-E2-R | MIROC5     | CCSM4      |
| Lewis and Clark National Historical Trail                             | GISS-E2-R | INMCM4    | MRI-CGCM3 | CNRM-CM5   | MIROC5     |
| Little Bighorn Battlefield National Monument                          | INMCM4    | MRI-CGCM3 | GISS-E2-R | MPI-ESM-LR | CCSM4      |
| Lincoln Boyhood National Memorial                                     | INMCM4    | MRI-CGCM3 | CNRM-CM5  | GISS-E2-R  | MPI-ESM-LR |
| Lincoln Home National Historic Site                                   | INMCM4    | MRI-CGCM3 | CNRM-CM5  | GISS-E2-R  | NorESM1-M  |
| Lincoln Memorial National Memorial                                    | INMCM4    | MRI-CGCM3 | CNRM-CM5  | NorESM1-M  | GISS-E2-R  |
| Little River Canyon National Preserve                                 | INMCM4    | MRI-CGCM3 | CNRM-CM5  | MPI-ESM-LR | NorESM1-M  |
| Longfellow National Historic Site                                     | INMCM4    | GISS-E2-R | MRI-CGCM3 | NorESM1-M  | BCC-CSM1-1 |
| Lowell National Historical Park                                       | INMCM4    | GISS-E2-R | MRI-CGCM3 | NorESM1-M  | BCC-CSM1-1 |
| Lyndon Baines Johnson Memorial Grove on the Potomac National Memorial | INMCM4    | MRI-CGCM3 | CNRM-CM5  | NorESM1-M  | GISS-E2-R  |
| Mammoth Cave National Park                                            | INMCM4    | MRI-CGCM3 | CNRM-CM5  | MPI-ESM-LR | GISS-E2-R  |
| Martin Luther King, Jr. National Historic Site                        | INMCM4    | MRI-CGCM3 | CNRM-CM5  | MPI-ESM-LR | GISS-E2-R  |

| <b>Park</b>                                     | <b>Model 1</b> | <b>Model 2</b> | <b>Model 3</b> | <b>Model 4</b> | <b>Model 5</b> |
|-------------------------------------------------|----------------|----------------|----------------|----------------|----------------|
| Manassas National Battlefield Park              | INMCM4         | MRI-CGCM3      | CNRM-CM5       | NorESM1-M      | GISS-E2-R      |
| Manzanar National Historic Site                 | INMCM4         | MRI-CGCM3      | GISS-E2-R      | BCC-CSM1-1     | CCSM4          |
| Martin Van Buren National Historic Site         | INMCM4         | MRI-CGCM3      | GISS-E2-R      | NorESM1-M      | CNRM-CM5       |
| Mesa Verde National Park                        | INMCM4         | MRI-CGCM3      | GISS-E2-R      | BCC-CSM1-1     | CNRM-CM5       |
| Minute Man National Historical Park             | INMCM4         | GISS-E2-R      | MRI-CGCM3      | NorESM1-M      | BCC-CSM1-1     |
| Minuteman Missile National Historic Site        | MRI-CGCM3      | INMCM4         | GISS-E2-R      | NorESM1-M      | MPI-ESM-LR     |
| Missouri National Recreation River              | MRI-CGCM3      | INMCM4         | GISS-E2-R      | CNRM-CM5       | BCC-CSM1-1     |
| Montezuma Castle National Monument              | INMCM4         | MRI-CGCM3      | GISS-E2-R      | BCC-CSM1-1     | CCSM4          |
| Monocacy National Battlefield                   | INMCM4         | MRI-CGCM3      | CNRM-CM5       | GISS-E2-R      | MPI-ESM-LR     |
| Mount Rainier National Park                     | INMCM4         | MRI-CGCM3      | GISS-E2-R      | MIROC5         | CNRM-CM5       |
| Morristown National Historical Park             | INMCM4         | MRI-CGCM3      | NorESM1-M      | GISS-E2-R      | CNRM-CM5       |
| Mount Rushmore National Memorial                | INMCM4         | MRI-CGCM3      | GISS-E2-R      | NorESM1-M      | CCSM4          |
| Muir Woods National Monument                    | INMCM4         | MRI-CGCM3      | GISS-E2-R      | HadGEM2-CC     | CCSM4          |
| Natural Bridges National Monument               | INMCM4         | MRI-CGCM3      | GISS-E2-R      | BCC-CSM1-1     | MPI-ESM-LR     |
| National Capital combined Park                  | INMCM4         | MRI-CGCM3      | CNRM-CM5       | NorESM1-M      | GISS-E2-R      |
| Natchez National Historical Park                | INMCM4         | MRI-CGCM3      | CNRM-CM5       | MPI-ESM-LR     | GISS-E2-R      |
| Natchez Trace Parkway and National Scenic Trail | INMCM4         | MRI-CGCM3      | CNRM-CM5       | MPI-ESM-LR     | GISS-E2-R      |
| Navajo National Monument                        | INMCM4         | MRI-CGCM3      | GISS-E2-R      | BCC-CSM1-1     | MPI-ESM-LR     |
| Nez Perce National Historical Park              | INMCM4         | MRI-CGCM3      | GISS-E2-R      | MPI-ESM-LR     | CNRM-CM5       |
| New River Gorge National River                  | MRI-CGCM3      | INMCM4         | CNRM-CM5       | MPI-ESM-LR     | GISS-E2-R      |
| Nicodemus National Historic Site                | INMCM4         | MRI-CGCM3      | GISS-E2-R      | CNRM-CM5       | NorESM1-M      |

| <b>Park</b>                                                       | <b>Model 1</b> | <b>Model 2</b> | <b>Model 3</b> | <b>Model 4</b> | <b>Model 5</b> |
|-------------------------------------------------------------------|----------------|----------------|----------------|----------------|----------------|
| Niobrara National Scenic River                                    | MRI-CGCM3      | INMCM4         | GISS-E2-R      | CNRM-CM5       | NorESM1-M      |
| Ninety Six National Historic Site                                 | INMCM4         | MRI-CGCM3      | CNRM-CM5       | MPI-ESM-LR     | NorESM1-M      |
| North Cascades National Park                                      | INMCM4         | MRI-CGCM3      | GISS-E2-R      | MIROC5         | CNRM-CM5       |
| Obed Wild and Scenic River                                        | INMCM4         | MRI-CGCM3      | CNRM-CM5       | MPI-ESM-LR     | NorESM1-M      |
| Olympic National Park                                             | INMCM4         | MRI-CGCM3      | GISS-E2-R      | CNRM-CM5       | MIROC5         |
| Oregon Caves National Monument                                    | MRI-CGCM3      | INMCM4         | GISS-E2-R      | CNRM-CM5       | MIROC5         |
| Ozark National Scenic Riverway                                    | MRI-CGCM3      | INMCM4         | CNRM-CM5       | GISS-E2-R      | MPI-ESM-LR     |
| Palo Alto Battlefield National Historic Site                      | INMCM4         | MRI-CGCM3      | BCC-CSM1-1     | GISS-E2-R      | CNRM-CM5       |
| Pennsylvania Avenue National Historic Site National Historic Site | INMCM4         | MRI-CGCM3      | CNRM-CM5       | NorESM1-M      | GISS-E2-R      |
| Padre Island National Seashore                                    | INMCM4         | MRI-CGCM3      | GISS-E2-R      | BCC-CSM1-1     | CNRM-CM5       |
| Pecos National Historic Park                                      | INMCM4         | MRI-CGCM3      | CCSM4          | GISS-E2-R      | BCC-CSM1-1     |
| Petrified Forest National Park                                    | INMCM4         | MRI-CGCM3      | BCC-CSM1-1     | CCSM4          | GISS-E2-R      |
| Pea Ridge National Military Park                                  | MRI-CGCM3      | INMCM4         | CNRM-CM5       | MIROC-ESM      | GISS-E2-R      |
| Petersburg National Battlefield                                   | INMCM4         | MRI-CGCM3      | CNRM-CM5       | MPI-ESM-LR     | NorESM1-M      |
| Petroglyph National Monument                                      | INMCM4         | MRI-CGCM3      | CCSM4          | GISS-E2-R      | BCC-CSM1-1     |
| Perry's Victory and International Peace Memorial                  | INMCM4         | MRI-CGCM3      | NorESM1-M      | CNRM-CM5       | GISS-E2-R      |
| Pipestone National Monument                                       | MRI-CGCM3      | INMCM4         | GISS-E2-R      | CNRM-CM5       | BCC-CSM1-1     |
| Pictured Rocks National Lakeshore                                 | INMCM4         | GISS-E2-R      | NorESM1-M      | MRI-CGCM3      | CCSM4          |
| Piscataway Park                                                   | INMCM4         | MRI-CGCM3      | CNRM-CM5       | NorESM1-M      | GISS-E2-R      |
| Pipe Spring National Monument                                     | INMCM4         | MRI-CGCM3      | GISS-E2-R      | CCSM4          | MPI-ESM-LR     |

| Park                                            | Model 1   | Model 2    | Model 3   | Model 4    | Model 5    |
|-------------------------------------------------|-----------|------------|-----------|------------|------------|
| Point Reyes National Seashore                   | INMCM4    | MRI-CGCM3  | GISS-E2-R | HadGEM2-CC | CCSM4      |
| Prince William Forest Park                      | INMCM4    | MRI-CGCM3  | CNRM-CM5  | NorESM1-M  | GISS-E2-R  |
| Rainbow Bridge National Monument                | INMCM4    | MRI-CGCM3  | GISS-E2-R | BCC-CSM1-1 | MPI-ESM-LR |
| Redwood National Park                           | CGCM3     | INMCM4     | GISS-E2-R | MIROC5     | CNRM-CM5   |
| Richmond National Battlefield Park              | INMCM4    | MRI-CGCM3  | CNRM-CM5  | NorESM1-M  | MPI-ESM-LR |
| Rock Creek Park Park                            | INMCM4    | MRI-CGCM3  | CNRM-CM5  | NorESM1-M  | GISS-E2-R  |
| Ross Lake National Recreation Area              | INMCM4    | MRI-CGCM3  | GISS-E2-R | CNRM-CM5   | MIROC5     |
| Rocky Mountain National Park                    | INMCM4    | MRI-CGCM3  | GISS-E2-R | MPI-ESM-LR | CCSM4      |
| Roger Williams National Memorial                | INMCM4    | GISS-E2-R  | MRI-CGCM3 | NorESM1-M  | BCC-CSM1-1 |
| Russell Cave National Monument                  | INMCM4    | MRI-CGCM3  | CNRM-CM5  | MPI-ESM-LR | NorESM1-M  |
| San Antonio Missions National Historic Park     | INMCM4    | MRI-CGCM3  | GISS-E2-R | CCSM4      | ACCESS1-0  |
| Saint Croix National Scenic River               | INMCM4    | MRI-CGCM3  | CNRM-CM5  | GISS-E2-R  | BCC-CSM1-1 |
| San Francisco Maritime National Historical Park | MRI-CGCM3 | INMCM4     | GISS-E2-R | HadGEM2-CC | CCSM4      |
| Saint-Gaudens National Historic Site            | INMCM4    | MRI-CGCM3  | GISS-E2-R | CNRM-CM5   | NorESM1-M  |
| Sagamore Hill National Historic Site            | INMCM4    | MRI-CGCM3  | GISS-E2-R | NorESM1-M  | CNRM-CM5   |
| Saugus Iron Works National Historic Site        | INMCM4    | GISS-E2-R  | MRI-CGCM3 | NorESM1-M  | BCC-CSM1-1 |
| San Juan National Historical Site               | INMCM4    | BCC-CSM1-1 | CNRM-CM5  | MRI-CGCM3  | CCSM4      |
| Salem Maritime National Historic Site           | INMCM4    | GISS-E2-R  | MRI-CGCM3 | NorESM1-M  | CCSM4      |
| Salinas Pueblo Missions National Monument       | INMCM4    | MRI-CGCM3  | CCSM4     | BCC-CSM1-1 | GISS-E2-R  |
| Saratoga National Historical Park               | INMCM4    | MRI-CGCM3  | GISS-E2-R | NorESM1-M  | CNRM-CM5   |
| Scotts Bluff National Monument                  | INMCM4    | MRI-CGCM3  | GISS-E2-R | NorESM1-M  | CCSM4      |

| Park                                                                        | Model 1       | Model 2       | Model 3       | Model 4        | Model 5        |
|-----------------------------------------------------------------------------|---------------|---------------|---------------|----------------|----------------|
| Sequoia National Park                                                       | INMCM4        | MRI-<br>CGCM3 | GISS-E2-R     | CNRM-<br>CM5   | BCC-CSM1-1     |
| Shenandoah National Park                                                    | INMCM4        | MRI-<br>CGCM3 | CNRM-<br>CM5  | NorESM1-<br>M  | GISS-E2-R      |
| Shiloh National Battlefield                                                 | INMCM4        | MRI-<br>CGCM3 | CNRM-<br>CM5  | MPI-ESM-<br>LR | GISS-E2-R      |
| Sitka National Historical<br>Park                                           | INMCM4        | MRI-<br>CGCM3 | GISS-E2-R     | MIROC5         | HadGEM2-<br>CC |
| Sleeping Bear Dunes<br>National Lakeshore                                   | INMCM4        | GISS-E2-R     | NorESM1-<br>M | MRI-<br>CGCM3  | BCC-CSM1-1     |
| Springfield Armory<br>National Historic Site                                | INMCM4        | MRI-<br>CGCM3 | GISS-E2-R     | NorESM1-<br>M  | CNRM-CM5       |
| Steamtown National<br>Historic Site                                         | INMCM4        | MRI-<br>CGCM3 | NorESM1-<br>M | CNRM-<br>CM5   | GISS-E2-R      |
| Statue Of Liberty National<br>Monument                                      | INMCM4        | MRI-<br>CGCM3 | NorESM1-<br>M | GISS-E2-R      | CNRM-CM5       |
| Stones River National<br>Battlefield                                        | INMCM4        | MRI-<br>CGCM3 | CNRM-<br>CM5  | MPI-ESM-<br>LR | GISS-E2-R      |
| Sunset Crater Volcano<br>National Monument                                  | INMCM4        | MRI-<br>CGCM3 | GISS-E2-R     | BCC-CSM1-<br>1 | CCSM4          |
| Tallgrass Prairie National<br>Preserve                                      | MRI-<br>CGCM3 | INMCM4        | GISS-E2-R     | CNRM-<br>CM5   | CCSM4          |
| Theodore Roosevelt Island<br>National Memorial                              | INMCM4        | MRI-<br>CGCM3 | CNRM-<br>CM5  | NorESM1-<br>M  | GISS-E2-R      |
| Theodore Roosevelt<br>National Park                                         | MRI-<br>CGCM3 | INMCM4        | GISS-E2-R     | CNRM-<br>CM5   | BCC-CSM1-1     |
| Timpanogos Cave National<br>Monument                                        | MRI-<br>CGCM3 | INMCM4        | GISS-E2-R     | MPI-ESM-<br>LR | BCC-CSM1-1     |
| Tumacacori National<br>Historical Park                                      | INMCM4        | MRI-<br>CGCM3 | GISS-E2-R     | BCC-CSM1-<br>1 | CCSM4          |
| Tuzigoot National<br>Monument                                               | INMCM4        | MRI-<br>CGCM3 | GISS-E2-R     | BCC-CSM1-<br>1 | CCSM4          |
| Ulysses S. Grant National<br>Historic Site                                  | MRI-<br>CGCM3 | INMCM4        | CNRM-<br>CM5  | GISS-E2-R      | CCSM4          |
| Upper Delaware Scenic and<br>Recreational River                             | INMCM4        | MRI-<br>CGCM3 | NorESM1-<br>M | GISS-E2-R      | CNRM-CM5       |
| Valley Forge National<br>Historical Park                                    | INMCM4        | MRI-<br>CGCM3 | GISS-E2-R     | NorESM1-<br>M  | CNRM-CM5       |
| World War II Valor in the<br>Pacific National Monument<br>National Monument | INMCM4        | MRI-<br>CGCM3 | GISS-E2-R     | MIROC5         | CNRM-CM5       |

| Park                                            | Model 1   | Model 2    | Model 3    | Model 4    | Model 5    |
|-------------------------------------------------|-----------|------------|------------|------------|------------|
| Vanderbilt Mansion National Historic Site       | INMCM4    | MRI-CGCM3  | GISS-E2-R  | NorESM1-M  | CNRM-CM5   |
| Vicksburg National Military Park                | INMCM4    | MRI-CGCM3  | CNRM-CM5   | MPI-ESM-LR | GISS-E2-R  |
| Virgin Islands National Park                    | INMCM4    | BCC-CSM1-1 | CNRM-CM5   | MRI-CGCM3  | CCSM4      |
| Vietnam Veterans Memorial National Memorial     | INMCM4    | MRI-CGCM3  | CNRM-CM5   | NorESM1-M  | GISS-E2-R  |
| Voyageurs National Park                         | INMCM4    | MRI-CGCM3  | GISS-E2-R  | CNRM-CM5   | BCC-CSM1-1 |
| Washita Battlefield National Historic Site      | INMCM4    | MRI-CGCM3  | GISS-E2-R  | CNRM-CM5   | CCSM4      |
| Walnut Canyon National Monument                 | INMCM4    | MRI-CGCM3  | GISS-E2-R  | BCC-CSM1-1 | CCSM4      |
| Weir Farm National Historic Site                | INMCM4    | MRI-CGCM3  | GISS-E2-R  | NorESM1-M  | BCC-CSM1-1 |
| Whiskeytown National Recreation Area            | MRI-CGCM3 | INMCM4     | GISS-E2-R  | MIROC5     | CNRM-CM5   |
| Whitman Mission National Historic Site          | INMCM4    | GISS-E2-R  | MRI-CGCM3  | CNRM-CM5   | MPI-ESM-LR |
| White Sands National Monument                   | INMCM4    | MRI-CGCM3  | BCC-CSM1-1 | CCSM4      | GISS-E2-R  |
| Wind Cave National Park                         | MRI-CGCM3 | INMCM4     | GISS-E2-R  | NorESM1-M  | MPI-ESM-LR |
| Wilson's Creek National Battlefield             | MRI-CGCM3 | INMCM4     | CNRM-CM5   | GISS-E2-R  | MIROC-ESM  |
| William Howard Taft National Historic Site      | INMCM4    | MRI-CGCM3  | CNRM-CM5   | GISS-E2-R  | MPI-ESM-LR |
| Women's Rights National Historical Park         | INMCM4    | MRI-CGCM3  | CNRM-CM5   | NorESM1-M  | CCSM4      |
| Wolf Trap National Park for the Performing Arts | INMCM4    | MRI-CGCM3  | CNRM-CM5   | NorESM1-M  | GISS-E2-R  |
| Wright Brothers National Memorial               | INMCM4    | MRI-CGCM3  | CNRM-CM5   | GISS-E2-R  | MPI-ESM-LR |
| Wrangell-St. Elias National Park & Preserve     | MRI-CGCM3 | INMCM4     | GISS-E2-R  | CNRM-CM5   | MIROC5     |
| Wupatki National Monument                       | INMCM4    | MRI-CGCM3  | GISS-E2-R  | MPI-ESM-LR | BCC-CSM1-1 |
| World War II Memorial National Memorial         | INMCM4    | MRI-CGCM3  | CNRM-CM5   | NorESM1-M  | GISS-E2-R  |

| <b>Park</b>               | <b>Model 1</b> | <b>Model 2</b> | <b>Model 3</b> | <b>Model 4</b> | <b>Model 5</b> |
|---------------------------|----------------|----------------|----------------|----------------|----------------|
| Yellowstone National Park | MRI-<br>CGCM3  | INMCM4         | GISS-E2-R      | CNRM-<br>CM5   | MPI-ESM-LR     |
| Yosemite National Park    | INMCM4         | MRI-<br>CGCM3  | GISS-E2-R      | CCSM4          | BCC-CSM1-1     |
| Zion National Park        | INMCM4         | MRI-<br>CGCM3  | GISS-E2-R      | MPI-ESM-<br>LR | BCC-CSM1-1     |
