# Supplementary material for: Protected Area Tourism in a Changing Climate: Will Visitation at US National Parks Warm Up or Overheat?
Source: PubMed Central journal article supplement (PMC4470629; doi:10.1371/journal.pone.0128226), 2015-06-17
Supplement: pone.0128226.s007.pdf [file pone.0128226.s007.pdf]

**S2 Table. The five individual climate models used in the representative concentration pathway (RCP) 8.5 W/m<sup>2</sup> high climate change temperature projections for each park.** These selected Coupled Model Intercomparison Project Phase 5 (CMIP5) models have the five highest estimates of annual mean temperature out of 17 possible models for 2041-2060. Future projections were ensemble averaged across these five climate models.

| Park                                                  | Model 1        | Model 2        | Model 3        | Model 4        | Model 5        |
|-------------------------------------------------------|----------------|----------------|----------------|----------------|----------------|
| Abraham Lincoln Birthplace National Historic Site     | HadGEM2-ES     | ACCESS1-0      | MIROC-ESM      | HadGEM2-AO     | MIROC-ESM-CHEM |
| Acadia National Park                                  | MIROC-ESM-CHEM | MIROC-ESM      | GFDL-CM3       | HadGEM2-ES     | ACCESS1-0      |
| Adams National Historical Park                        | MIROC-ESM-CHEM | MIROC-ESM      | GFDL-CM3       | MIROC5         | HadGEM2-ES     |
| Agate Fossil Beds National Monument                   | HadGEM2-AO     | ACCESS1-0      | MIROC-ESM      | MIROC-ESM-CHEM | HadGEM2-ES     |
| Allegheny Portage Railroad National Historic Site     | GFDL-CM3       | MIROC-ESM      | MIROC-ESM-CHEM | HadGEM2-ES     | ACCESS1-0      |
| Andersonville National Historical Site                | MIROC-ESM-CHEM | HadGEM2-ES     | HadGEM2-CC     | ACCESS1-0      | GFDL-CM3       |
| Antietam National Battlefield                         | MIROC-ESM      | GFDL-CM3       | HadGEM2-ES     | MIROC-ESM-CHEM | ACCESS1-0      |
| Appomattox Court House National Historical Park       | MIROC-ESM      | HadGEM2-ES     | GFDL-CM3       | HadGEM2-CC     | ACCESS1-0      |
| Apostle Islands National Lakeshore                    | MIROC-ESM      | MIROC-ESM-CHEM | ACCESS1-0      | GFDL-CM3       | HadGEM2-ES     |
| Arches National Park                                  | MIROC-ESM-CHEM | MIROC-ESM      | GFDL-CM3       | HadGEM2-AO     | MIROC5         |
| Arlington House / The Robert E. Lee National Memorial | MIROC-ESM      | HadGEM2-ES     | GFDL-CM3       | MIROC-ESM-CHEM | ACCESS1-0      |
| Assateague Island National Seashore                   | MIROC-ESM-CHEM | MIROC-ESM      | GFDL-CM3       | IPSL-CM5A-LR   | MIROC5         |

| Park                                              | Model 1        | Model 2        | Model 3      | Model 4        | Model 5      |
|---------------------------------------------------|----------------|----------------|--------------|----------------|--------------|
| Aztec Ruins National Monument                     | MIROC-ESM-CHEM | GFDL-CM3       | MIROC-ESM    | IPSL-CM5A-LR   | MIROC5       |
| Badlands National Park                            | HadGEM2-AO     | ACCESS1-0      | MIROC-ESM    | MIROC-ESM-CHEM | HadGEM2-ES   |
| Bandelier National Monument                       | MIROC-ESM-CHEM | MIROC-ESM      | IPSL-CM5A-LR | GFDL-CM3       | HadGEM2-ES   |
| Bent's Old Fort National Historic Site            | MIROC-ESM-CHEM | IPSL-CM5A-LR   | HadGEM2-ES   | HadGEM2-AO     | ACCESS1-0    |
| Bighorn Canyon National Recreation Area           | MIROC-ESM-CHEM | MIROC-ESM      | HadGEM2-AO   | ACCESS1-0      | HadGEM2-ES   |
| Big Cypress National Preserve                     | MIROC-ESM-CHEM | GFDL-CM3       | MIROC-ESM    | HadGEM2-ES     | IPSL-CM5A-LR |
| Big Hole National Battlefield                     | MIROC-ESM-CHEM | MIROC-ESM      | IPSL-CM5A-LR | HadGEM2-AO     | GFDL-CM3     |
| Big South Fork National River and Recreation Area | HadGEM2-ES     | GFDL-CM3       | ACCESS1-0    | HadGEM2-CC     | HadGEM2-AO   |
| Black Canyon of the Gunnison National Park        | GFDL-CM3       | MIROC-ESM-CHEM | IPSL-CM5A-LR | MIROC-ESM      | MIROC5       |
| Blue Ridge Parkway                                | GFDL-CM3       | HadGEM2-ES     | HadGEM2-CC   | ACCESS1-0      | MIROC-ESM    |
| Bluestone National Scenic River                   | GFDL-CM3       | HadGEM2-ES     | ACCESS1-0    | MIROC-ESM      | HadGEM2-CC   |
| Boston African American National Historic Site    | MIROC-ESM-CHEM | MIROC-ESM      | GFDL-CM3     | MIROC5         | HadGEM2-ES   |
| Boston National Historical Park                   | MIROC-ESM-CHEM | MIROC-ESM      | GFDL-CM3     | MIROC5         | HadGEM2-ES   |
| Booker T. Washington National Monument            | GFDL-CM3       | HadGEM2-ES     | MIROC-ESM    | HadGEM2-CC     | ACCESS1-0    |
| Bryce Canyon National Park                        | MIROC-ESM-CHEM | MIROC-ESM      | HadGEM2-AO   | IPSL-CM5A-LR   | HadGEM2-ES   |

| <b>Park</b>                               | <b>Model 1</b> | <b>Model 2</b> | <b>Model 3</b> | <b>Model 4</b> | <b>Model 5</b> |
|-------------------------------------------|----------------|----------------|----------------|----------------|----------------|
| Buffalo National River                    | MIROC-ESM-CHEM | ACCESS1-0      | MIROC-ESM      | HadGEM2-ES     | HadGEM2-AO     |
| Canyon de Chelly National Monument        | MIROC-ESM-CHEM | MIROC-ESM      | GFDL-CM3       | IPSL-CM5A-LR   | HadGEM2-AO     |
| Castle Clinton National Monument          | MIROC-ESM      | MIROC-ESM-CHEM | GFDL-CM3       | MIROC5         | HadGEM2-ES     |
| Cape Cod National Seashore                | MIROC-ESM-CHEM | MIROC-ESM      | GFDL-CM3       | HadGEM2-ES     | MIROC5         |
| Casa Grande Ruins National Monument       | MIROC-ESM-CHEM | IPSL-CM5A-LR   | MIROC-ESM      | HadGEM2-ES     | GFDL-CM3       |
| Cape Hatteras National Seashore           | GFDL-CM3       | MIROC-ESM-CHEM | MIROC-ESM      | IPSL-CM5A-LR   | HadGEM2-ES     |
| Cape Lookout National Seashore            | GFDL-CM3       | MIROC-ESM-CHEM | MIROC-ESM      | IPSL-CM5A-LR   | HadGEM2-ES     |
| Canyonlands National Park                 | MIROC-ESM-CHEM | MIROC-ESM      | GFDL-CM3       | HadGEM2-AO     | IPSL-CM5A-LR   |
| Capitol Reef National Park                | MIROC-ESM-CHEM | MIROC-ESM      | HadGEM2-AO     | GFDL-CM3       | IPSL-CM5A-LR   |
| Carl Sandburg Home National Historic Site | HadGEM2-ES     | GFDL-CM3       | HadGEM2-CC     | MIROC-ESM      | ACCESS1-0      |
| Catoctin Mountain Park                    | MIROC-ESM      | GFDL-CM3       | HadGEM2-ES     | MIROC-ESM-CHEM | ACCESS1-0      |
| Carlsbad Caverns National Park            | IPSL-CM5A-LR   | MIROC-ESM-CHEM | HadGEM2-ES     | GFDL-CM3       | HadGEM2-CC     |
| Capulin Volcano National Monument         | MIROC-ESM-CHEM | IPSL-CM5A-LR   | HadGEM2-ES     | ACCESS1-0      | MIROC-ESM      |
| Cedar Breaks National Monument            | MIROC-ESM-CHEM | MIROC-ESM      | HadGEM2-AO     | IPSL-CM5A-LR   | HadGEM2-ES     |

| <b>Park</b>                                            | <b>Model 1</b> | <b>Model 2</b> | <b>Model 3</b> | <b>Model 4</b> | <b>Model 5</b> |
|--------------------------------------------------------|----------------|----------------|----------------|----------------|----------------|
| Chamizal National Memorial                             | IPSL-CM5A-LR   | MIROC-ESM-CHEM | HadGEM2-ES     | HadGEM2-CC     | GFDL-CM3       |
| Chattahoochee River National Recreation Area           | HadGEM2-ES     | HadGEM2-CC     | HadGEM2-AO     | MIROC-ESM      | GFDL-CM3       |
| Chickamauga and Chattanooga National Military Park     | HadGEM2-ES     | MIROC-ESM      | HadGEM2-CC     | GFDL-CM3       | ACCESS1-0      |
| Chaco Culture National Historical Park                 | MIROC-ESM-CHEM | GFDL-CM3       | MIROC-ESM      | IPSL-CM5A-LR   | MIROC5         |
| Chickasaw National Recreation Area                     | MIROC-ESM-CHEM | IPSL-CM5A-LR   | MIROC5         | ACCESS1-0      | HadGEM2-AO     |
| Channel Islands National Park                          | MIROC-ESM-CHEM | IPSL-CM5A-LR   | MIROC-ESM      | HadGEM2-ES     | GFDL-CM3       |
| Chesapeake and Ohio Canal National Historic Park       | MIROC-ESM      | GFDL-CM3       | HadGEM2-ES     | ACCESS1-0      | MIROC-ESM-CHEM |
| Charles Pinckney National Historic Site                | MIROC-ESM      | GFDL-CM3       | MIROC-ESM-CHEM | IPSL-CM5A-LR   | HadGEM2-ES     |
| Christiansted National Historic Site                   | IPSL-CM5A-LR   | GFDL-CM3       | MIROC-ESM      | MIROC-ESM-CHEM | HadGEM2-ES     |
| Little Rock Central High School National Historic Site | MIROC-ESM-CHEM | MIROC-ESM      | HadGEM2-ES     | HadGEM2-AO     | ACCESS1-0      |
| City of Rocks National Reserve                         | MIROC-ESM-CHEM | MIROC-ESM      | HadGEM2-AO     | ACCESS1-0      | IPSL-CM5A-LR   |
| Colorado National Monument                             | MIROC-ESM-CHEM | GFDL-CM3       | MIROC-ESM      | ACCESS1-0      | MIROC5         |
| Colonial National Historical Park                      | MIROC-ESM      | MIROC-ESM-CHEM | GFDL-CM3       | ACCESS1-0      | IPSL-CM5A-LR   |
| Congaree National Park                                 | HadGEM2-ES     | HadGEM2-CC     | MIROC-ESM      | GFDL-CM3       | ACCESS1-0      |
| Cowpens National Battlefield                           | HadGEM2-ES     | HadGEM2-CC     | GFDL-CM3       | ACCESS1-0      | MIROC-ESM      |

| <b>Park</b>                                       | <b>Model 1</b> | <b>Model 2</b> | <b>Model 3</b> | <b>Model 4</b> | <b>Model 5</b> |
|---------------------------------------------------|----------------|----------------|----------------|----------------|----------------|
| Crater Lake National Park                         | HadGEM2-AO     | IPSL-CM5A-LR   | HadGEM2-ES     | MIROC-ESM-CHEM | MIROC-ESM      |
| Craters of the Moon National Monument             | MIROC-ESM-CHEM | MIROC-ESM      | HadGEM2-AO     | GFDL-CM3       | ACCESS1-0      |
| Cumberland Gap National Historical Park           | HadGEM2-ES     | GFDL-CM3       | ACCESS1-0      | HadGEM2-CC     | MIROC-ESM      |
| Curecanti National Recreation Area                | GFDL-CM3       | MIROC-ESM-CHEM | IPSL-CM5A-LR   | MIROC5         | ACCESS1-0      |
| Cuyahoga Valley National Park                     | MIROC-ESM      | HadGEM2-ES     | MIROC-ESM-CHEM | ACCESS1-0      | HadGEM2-CC     |
| Dayton Aviation Heritage National Historical Park | MIROC-ESM      | HadGEM2-ES     | ACCESS1-0      | MIROC-ESM-CHEM | HadGEM2-AO     |
| Denali National Park & Preserve                   | GFDL-CM3       | HadGEM2-ES     | MIROC-ESM-CHEM | ACCESS1-0      | HadGEM2-CC     |
| Devils Postpile National Monument                 | MIROC-ESM      | MIROC-ESM-CHEM | IPSL-CM5A-LR   | HadGEM2-AO     | GFDL-CM3       |
| Devils Tower National Monument                    | HadGEM2-AO     | ACCESS1-0      | MIROC-ESM-CHEM | HadGEM2-ES     | MIROC-ESM      |
| Death Valley National Park                        | MIROC-ESM      | MIROC-ESM-CHEM | IPSL-CM5A-LR   | HadGEM2-AO     | GFDL-CM3       |
| Delaware Water Gap National Recreation Area       | MIROC-ESM      | MIROC-ESM-CHEM | GFDL-CM3       | HadGEM2-ES     | ACCESS1-0      |
| Dinosaur National Monument                        | MIROC-ESM-CHEM | MIROC-ESM      | GFDL-CM3       | HadGEM2-AO     | ACCESS1-0      |
| Edison National Historic Site                     | MIROC-ESM      | MIROC-ESM-CHEM | GFDL-CM3       | MIROC5         | HadGEM2-ES     |
| Effigy Mounds National Monument                   | MIROC-ESM      | MIROC-ESM-CHEM | ACCESS1-0      | HadGEM2-ES     | HadGEM2-AO     |

| Park                                     | Model 1        | Model 2        | Model 3        | Model 4    | Model 5        |
|------------------------------------------|----------------|----------------|----------------|------------|----------------|
| Eisenhower National Historic Site        | MIROC-ESM      | GFDL-CM3       | HadGEM2-ES     | MIROC5     | MIROC-ESM-CHEM |
| El Malpais National Monument             | MIROC-ESM-CHEM | MIROC-ESM      | IPSL-CM5A-LR   | GFDL-CM3   | HadGEM2-ES     |
| El Morro National Monument               | MIROC-ESM-CHEM | MIROC-ESM      | IPSL-CM5A-LR   | GFDL-CM3   | HadGEM2-ES     |
| Eleanor Roosevelt National Historic Site | MIROC-ESM-CHEM | MIROC-ESM      | GFDL-CM3       | MIROC5     | IPSL-CM5A-LR   |
| Everglades National Park                 | GFDL-CM3       | MIROC-ESM-CHEM | MIROC-ESM      | HadGEM2-ES | IPSL-CM5A-LR   |
| Federal Hall National Memorial           | MIROC-ESM      | MIROC-ESM-CHEM | GFDL-CM3       | MIROC5     | HadGEM2-ES     |
| Fire Island National Seashore            | MIROC-ESM-CHEM | MIROC-ESM      | GFDL-CM3       | MIROC5     | IPSL-CM5A-LR   |
| Florissant Fossil Beds National Monument | MIROC-ESM-CHEM | IPSL-CM5A-LR   | GFDL-CM3       | HadGEM2-AO | ACCESS1-0      |
| Fort Bowie National Historic Site        | MIROC-ESM-CHEM | IPSL-CM5A-LR   | MIROC-ESM      | HadGEM2-ES | HadGEM2-CC     |
| Fossil Butte National Monument           | MIROC-ESM-CHEM | MIROC-ESM      | HadGEM2-AO     | GFDL-CM3   | MIROC5         |
| Fort Caroline National Memorial          | MIROC-ESM-CHEM | MIROC-ESM      | GFDL-CM3       | HadGEM2-ES | IPSL-CM5A-LR   |
| Fort Donelson National Battlefield       | HadGEM2-ES     | MIROC-ESM      | ACCESS1-0      | HadGEM2-AO | MIROC-ESM-CHEM |
| Fort Laramie National Historic Site      | HadGEM2-AO     | ACCESS1-0      | MIROC-ESM-CHEM | MIROC-ESM  | IPSL-CM5A-LR   |
| Fort Larned National Historic Site       | MIROC-ESM-CHEM | HadGEM2-ES     | HadGEM2-AO     | ACCESS1-0  | MIROC5         |

| <b>Park</b>                                        | <b>Model 1</b> | <b>Model 2</b> | <b>Model 3</b> | <b>Model 4</b> | <b>Model 5</b> |
|----------------------------------------------------|----------------|----------------|----------------|----------------|----------------|
| Fort Matanzas National Monument                    | MIROC-ESM-CHEM | MIROC-ESM      | GFDL-CM3       | IPSL-CM5A-LR   | HadGEM2-ES     |
| Fort McHenry National Monument and Historic Shrine | MIROC-ESM      | MIROC-ESM-CHEM | HadGEM2-ES     | GFDL-CM3       | ACCESS1-0      |
| Fort Necessity National Battlefield                | GFDL-CM3       | MIROC-ESM      | HadGEM2-ES     | ACCESS1-0      | MIROC-ESM-CHEM |
| Fort Point National Historic Site                  | MIROC-ESM      | MIROC-ESM-CHEM | IPSL-CM5A-LR   | HadGEM2-AO     | HadGEM2-ES     |
| Fort Raleigh National Historical Site              | GFDL-CM3       | MIROC-ESM-CHEM | MIROC-ESM      | IPSL-CM5A-LR   | HadGEM2-ES     |
| Fort Scott National Historic Site                  | MIROC-ESM-CHEM | ACCESS1-0      | MIROC-ESM      | MIROC5         | HadGEM2-ES     |
| Fort Smith National Historic Site                  | MIROC-ESM-CHEM | ACCESS1-0      | MIROC5         | HadGEM2-ES     | HadGEM2-AO     |
| Fort Stanwix National Monument                     | MIROC-ESM      | MIROC-ESM-CHEM | GFDL-CM3       | MIROC5         | IPSL-CM5A-LR   |
| Fort Sumter National Monument                      | MIROC-ESM      | GFDL-CM3       | MIROC-ESM-CHEM | IPSL-CM5A-LR   | HadGEM2-ES     |
| Fort Union National Monument                       | MIROC-ESM-CHEM | IPSL-CM5A-LR   | GFDL-CM3       | MIROC-ESM      | HadGEM2-ES     |
| Fort Union Trading Post National Historic Site     | MIROC-ESM      | MIROC-ESM-CHEM | ACCESS1-0      | HadGEM2-AO     | HadGEM2-ES     |
| Fort Vancouver National Historic Site              | HadGEM2-AO     | MIROC-ESM-CHEM | MIROC-ESM      | IPSL-CM5A-LR   | HadGEM2-ES     |
| Fort Washington Park                               | MIROC-ESM      | HadGEM2-ES     | GFDL-CM3       | MIROC-ESM-CHEM | ACCESS1-0      |
| Friendship Hill National Historic Site             | GFDL-CM3       | MIROC-ESM      | HadGEM2-ES     | ACCESS1-0      | MIROC-ESM-CHEM |

| Park                                                   | Model 1        | Model 2        | Model 3      | Model 4        | Model 5        |
|--------------------------------------------------------|----------------|----------------|--------------|----------------|----------------|
| Fredericksburg and Spotsylvania National Military Park | MIROC-ESM      | GFDL-CM3       | HadGEM2-ES   | MIROC-ESM-CHEM | ACCESS1-0      |
| Gateway National Recreation Area                       | MIROC-ESM-CHEM | MIROC-ESM      | GFDL-CM3     | MIROC5         | IPSL-CM5A-LR   |
| General Grant National Memorial                        | MIROC-ESM-CHEM | MIROC-ESM      | GFDL-CM3     | MIROC5         | IPSL-CM5A-LR   |
| Gettysburg National Military Park                      | MIROC-ESM      | GFDL-CM3       | HadGEM2-ES   | MIROC5         | MIROC-ESM-CHEM |
| George Washington Birthplace National Monument         | MIROC-ESM      | MIROC-ESM-CHEM | GFDL-CM3     | ACCESS1-0      | HadGEM2-ES     |
| Gila Cliff Dwellings National Monument                 | MIROC-ESM-CHEM | MIROC-ESM      | IPSL-CM5A-LR | HadGEM2-ES     | HadGEM2-CC     |
| Glacier National Park                                  | MIROC-ESM      | MIROC-ESM-CHEM | HadGEM2-AO   | IPSL-CM5A-LR   | HadGEM2-ES     |
| Glacier Bay National Park & Preserve                   | MIROC-ESM-CHEM | IPSL-CM5A-LR   | MPI-ESM-LR   | MIROC-ESM      | CCSM4          |
| Glen Canyon National Recreation Area                   | MIROC-ESM-CHEM | MIROC-ESM      | HadGEM2-AO   | GFDL-CM3       | IPSL-CM5A-LR   |
| Golden Gate National Recreation Area                   | MIROC-ESM-CHEM | MIROC-ESM      | IPSL-CM5A-LR | HadGEM2-ES     | HadGEM2-AO     |
| Governors Island National Monument                     | MIROC-ESM      | MIROC-ESM-CHEM | GFDL-CM3     | MIROC5         | HadGEM2-ES     |
| Golden Spike National Historic Site                    | MIROC-ESM-CHEM | MIROC-ESM      | HadGEM2-AO   | GFDL-CM3       | ACCESS1-0      |
| Great Basin National Park                              | MIROC-ESM-CHEM | MIROC-ESM      | IPSL-CM5A-LR | HadGEM2-AO     | HadGEM2-ES     |
| Grand Canyon National Park                             | MIROC-ESM-CHEM | MIROC-ESM      | HadGEM2-AO   | IPSL-CM5A-LR   | HadGEM2-ES     |



| Park                                       | Model 1        | Model 2        | Model 3      | Model 4        | Model 5      |
|--------------------------------------------|----------------|----------------|--------------|----------------|--------------|
| Greenbelt Park                             | MIROC-ESM      | MIROC-ESM-CHEM | HadGEM2-ES   | GFDL-CM3       | ACCESS1-0    |
| Grant-Kohrs Ranch National Historic Site   | MIROC-ESM-CHEM | HadGEM2-AO     | MIROC-ESM    | IPSL-CM5A-LR   | HadGEM2-ES   |
| Grand Portage National Monument            | MIROC-ESM      | MIROC-ESM-CHEM | GFDL-CM3     | HadGEM2-ES     | ACCESS1-0    |
| Great Sand Dunes National Park             | GFDL-CM3       | MIROC-ESM-CHEM | IPSL-CM5A-LR | ACCESS1-0      | HadGEM2-ES   |
| Great Smoky Mountains National Park        | HadGEM2-ES     | GFDL-CM3       | MIROC-ESM    | HadGEM2-CC     | ACCESS1-0    |
| Grand Teton National Park                  | MIROC-ESM-CHEM | MIROC-ESM      | IPSL-CM5A-LR | GFDL-CM3       | HadGEM2-AO   |
| Guilford Courthouse National Military Park | HadGEM2-ES     | HadGEM2-CC     | GFDL-CM3     | MIROC-ESM      | ACCESS1-0    |
| Gulf Islands National Seashore             | MIROC-ESM-CHEM | MIROC-ESM      | HadGEM2-ES   | GFDL-CM3       | IPSL-CM5A-LR |
| Guadalupe Mountains National Park          | IPSL-CM5A-LR   | MIROC-ESM-CHEM | HadGEM2-ES   | HadGEM2-CC     | GFDL-CM3     |
| George Washington Carver National Monument | MIROC-ESM-CHEM | ACCESS1-0      | MIROC-ESM    | HadGEM2-AO     | MIROC5       |
| George Washington Memorial Parkway         | MIROC-ESM      | HadGEM2-ES     | GFDL-CM3     | MIROC-ESM-CHEM | ACCESS1-0    |
| Harpers Ferry National Historical Park     | MIROC-ESM      | GFDL-CM3       | HadGEM2-ES   | MIROC-ESM-CHEM | ACCESS1-0    |
| Hagerman Fossil Beds National Monument     | MIROC-ESM-CHEM | MIROC-ESM      | HadGEM2-AO   | ACCESS1-0      | HadGEM2-ES   |
| Hamilton Grange National Memorial          | MIROC-ESM-CHEM | MIROC-ESM      | GFDL-CM3     | MIROC5         | IPSL-CM5A-LR |
| Haleakala National Park                    | IPSL-CM5A-LR   | HadGEM2-ES     | GFDL-CM3     | HadGEM2-CC     | HadGEM2-AO   |

| <b>Park</b>                                          | <b>Model 1</b> | <b>Model 2</b> | <b>Model 3</b> | <b>Model 4</b> | <b>Model 5</b> |
|------------------------------------------------------|----------------|----------------|----------------|----------------|----------------|
| Hawai'i Volcanoes National Park                      | IPSL-CM5A-LR   | HadGEM2-ES     | GFDL-CM3       | HadGEM2-AO     | HadGEM2-CC     |
| Herbert Hoover National Historic Site                | MIROC-ESM      | ACCESS1-0      | MIROC-ESM-CHEM | HadGEM2-ES     | HadGEM2-AO     |
| Horseshoe Bend National Military Park                | MIROC-ESM-CHEM | HadGEM2-ES     | HadGEM2-CC     | ACCESS1-0      | IPSL-CM5A-LR   |
| Hopewell Culture National Historical Park            | HadGEM2-ES     | ACCESS1-0      | GFDL-CM3       | MIROC-ESM      | MIROC-ESM-CHEM |
| Home of Franklin D. Roosevelt National Historic Site | MIROC-ESM-CHEM | MIROC-ESM      | GFDL-CM3       | MIROC5         | IPSL-CM5A-LR   |
| Hopewell Furnace National Historic Site              | MIROC-ESM      | MIROC-ESM-CHEM | HadGEM2-ES     | GFDL-CM3       | MIROC5         |
| Homestead National Monument                          | ACCESS1-0      | MIROC-ESM-CHEM | HadGEM2-AO     | MIROC-ESM      | MIROC5         |
| Hot Springs National Park                            | MIROC-ESM-CHEM | HadGEM2-ES     | ACCESS1-0      | MIROC5         | HadGEM2-AO     |
| Hovenweep National Monument                          | MIROC-ESM-CHEM | MIROC-ESM      | GFDL-CM3       | HadGEM2-AO     | IPSL-CM5A-LR   |
| Harry S. Truman National Historic Site               | ACCESS1-0      | MIROC-ESM-CHEM | MIROC-ESM      | HadGEM2-AO     | HadGEM2-ES     |
| Hubbell Trading Post National Historic Site          | MIROC-ESM-CHEM | MIROC-ESM      | IPSL-CM5A-LR   | GFDL-CM3       | HadGEM2-ES     |
| Independence National Historical Park                | MIROC-ESM      | MIROC-ESM-CHEM | GFDL-CM3       | MIROC5         | IPSL-CM5A-LR   |
| Indiana Dunes National Lakeshore                     | MIROC-ESM      | MIROC-ESM-CHEM | ACCESS1-0      | HadGEM2-ES     | HadGEM2-AO     |
| Isle Royale National Park                            | MIROC-ESM      | MIROC-ESM-CHEM | GFDL-CM3       | HadGEM2-ES     | ACCESS1-0      |

| Park                                                    | Model 1        | Model 2        | Model 3        | Model 4      | Model 5        |
|---------------------------------------------------------|----------------|----------------|----------------|--------------|----------------|
| James A Garfield National Historic Site                 | MIROC-ESM      | MIROC-ESM-CHEM | HadGEM2-ES     | ACCESS1-0    | HadGEM2-CC     |
| Jewel Cave National Monument                            | HadGEM2-AO     | ACCESS1-0      | MIROC-ESM-CHEM | MIROC-ESM    | HadGEM2-ES     |
| Jefferson National Expansion Memorial National Memorial | MIROC-ESM-CHEM | MIROC-ESM      | ACCESS1-0      | HadGEM2-AO   | HadGEM2-ES     |
| Jimmy Carter National Historic Site                     | MIROC-ESM-CHEM | HadGEM2-ES     | HadGEM2-CC     | ACCESS1-0    | GFDL-CM3       |
| John Day Fossil Beds National Monument                  | HadGEM2-AO     | MIROC-ESM      | MIROC-ESM-CHEM | HadGEM2-ES   | IPSL-CM5A-LR   |
| John D. Rockefeller, Jr. Memorial Parkway               | MIROC-ESM-CHEM | MIROC-ESM      | IPSL-CM5A-LR   | HadGEM2-AO   | GFDL-CM3       |
| John Fitzgerald Kennedy National Historic Site          | MIROC-ESM-CHEM | MIROC-ESM      | GFDL-CM3       | MIROC5       | HadGEM2-ES     |
| Johnstown Flood National Memorial                       | GFDL-CM3       | MIROC-ESM      | MIROC-ESM-CHEM | HadGEM2-ES   | ACCESS1-0      |
| Joshua Tree National Park                               | GFDL-CM3       | HadGEM2-AO     | IPSL-CM5A-LR   | HadGEM2-ES   | HadGEM2-CC     |
| Katmai National Park & Preserve                         | HadGEM2-ES     | HadGEM2-AO     | ACCESS1-0      | GFDL-CM3     | HadGEM2-CC     |
| Kenai Fjords National Park                              | HadGEM2-AO     | GFDL-CM3       | HadGEM2-ES     | BCC-CSM1-1   | IPSL-CM5A-LR   |
| Kennesaw Mountain National Battlefield Park             | HadGEM2-ES     | HadGEM2-CC     | HadGEM2-AO     | MIROC-ESM    | MIROC-ESM-CHEM |
| Kings Canyon National Park                              | MIROC-ESM      | MIROC-ESM-CHEM | IPSL-CM5A-LR   | GFDL-CM3     | HadGEM2-AO     |
| Kings Mountain National Military Park                   | HadGEM2-ES     | HadGEM2-CC     | GFDL-CM3       | ACCESS1-0    | MIROC-ESM      |
| Klondike Gold Rush AK National Historical Park          | MIROC-ESM-CHEM | MIROC-ESM      | GFDL-CM3       | IPSL-CM5A-LR | HadGEM2-ES     |

| <b>Park</b>                                        | <b>Model 1</b> | <b>Model 2</b> | <b>Model 3</b> | <b>Model 4</b> | <b>Model 5</b> |
|----------------------------------------------------|----------------|----------------|----------------|----------------|----------------|
| Klondike Gold Rush WA National Historical Park     | HadGEM2-AO     | HadGEM2-ES     | HadGEM2-CC     | IPSL-CM5A-LR   | MIROC-ESM      |
| Knife River Indian Villages National Historic Site | MIROC-ESM      | MIROC-ESM-CHEM | ACCESS1-0      | HadGEM2-ES     | HadGEM2-AO     |
| Korean War Veterans Memorial National Memorial     | MIROC-ESM      | HadGEM2-ES     | GFDL-CM3       | MIROC-ESM-CHEM | ACCESS1-0      |
| Lava Beds National Monument                        | HadGEM2-AO     | HadGEM2-ES     | IPSL-CM5A-LR   | GFDL-CM3       | HadGEM2-CC     |
| Lake Chelan National Recreation Area               | HadGEM2-AO     | HadGEM2-ES     | IPSL-CM5A-LR   | HadGEM2-CC     | MIROC-ESM-CHEM |
| Lake Clark National Park & Preserve                | GFDL-CM3       | HadGEM2-ES     | HadGEM2-AO     | ACCESS1-0      | MPI-ESM-LR     |
| Lake Mead National Recreation Area                 | MIROC-ESM      | MIROC-ESM-CHEM | HadGEM2-AO     | IPSL-CM5A-LR   | HadGEM2-ES     |
| Lake Meredith National Recreation Area             | MIROC-ESM-CHEM | IPSL-CM5A-LR   | HadGEM2-ES     | GFDL-CM3       | ACCESS1-0      |
| Lake Roosevelt National Recreation Area            | HadGEM2-AO     | MIROC-ESM-CHEM | MIROC-ESM      | HadGEM2-ES     | IPSL-CM5A-LR   |
| Lassen Volcanic National Park                      | HadGEM2-AO     | HadGEM2-ES     | IPSL-CM5A-LR   | HadGEM2-CC     | GFDL-CM3       |
| Lewis and Clark National Historical Trail          | IPSL-CM5A-LR   | HadGEM2-AO     | MIROC-ESM-CHEM | MIROC-ESM      | HadGEM2-ES     |
| Little Bighorn Battlefield National Monument       | HadGEM2-AO     | MIROC-ESM      | MIROC-ESM-CHEM | ACCESS1-0      | HadGEM2-ES     |
| Lincoln Boyhood National Memorial                  | MIROC-ESM      | HadGEM2-ES     | ACCESS1-0      | MIROC-ESM-CHEM | HadGEM2-AO     |
| Lincoln Home National Historic Site                | MIROC-ESM      | MIROC-ESM-CHEM | ACCESS1-0      | HadGEM2-AO     | HadGEM2-ES     |
| Lincoln Memorial National Memorial                 | MIROC-ESM      | HadGEM2-ES     | GFDL-CM3       | MIROC-ESM-CHEM | ACCESS1-0      |

| <b>Park</b>                                                           | <b>Model 1</b> | <b>Model 2</b> | <b>Model 3</b> | <b>Model 4</b> | <b>Model 5</b> |
|-----------------------------------------------------------------------|----------------|----------------|----------------|----------------|----------------|
| Little River Canyon National Preserve                                 | HadGEM2-ES     | HadGEM2-CC     | ACCESS1-0      | MIROC-ESM      | GFDL-CM3       |
| Longfellow National Historic Site                                     | MIROC-ESM-CHEM | MIROC-ESM      | GFDL-CM3       | MIROC5         | HadGEM2-ES     |
| Lowell National Historical Park                                       | MIROC-ESM-CHEM | MIROC-ESM      | GFDL-CM3       | MIROC5         | HadGEM2-ES     |
| Lyndon Baines Johnson Memorial Grove on the Potomac National Memorial | MIROC-ESM      | HadGEM2-ES     | GFDL-CM3       | MIROC-ESM-CHEM | ACCESS1-0      |
| Mammoth Cave National Park                                            | HadGEM2-ES     | ACCESS1-0      | MIROC-ESM      | HadGEM2-AO     | HadGEM2-CC     |
| Martin Luther King, Jr. National Historic Site                        | HadGEM2-ES     | HadGEM2-CC     | HadGEM2-AO     | MIROC-ESM      | MIROC-ESM-CHEM |
| Manassas National Battlefield Park                                    | MIROC-ESM      | GFDL-CM3       | HadGEM2-ES     | MIROC-ESM-CHEM | ACCESS1-0      |
| Manzanar National Historic Site                                       | MIROC-ESM      | MIROC-ESM-CHEM | IPSL-CM5A-LR   | HadGEM2-ES     | HadGEM2-AO     |
| Martin Van Buren National Historic Site                               | MIROC-ESM-CHEM | GFDL-CM3       | MIROC-ESM      | MIROC5         | IPSL-CM5A-LR   |
| Mesa Verde National Park                                              | MIROC-ESM-CHEM | GFDL-CM3       | MIROC-ESM      | HadGEM2-AO     | IPSL-CM5A-LR   |
| Minute Man National Historical Park                                   | MIROC-ESM-CHEM | MIROC-ESM      | GFDL-CM3       | MIROC5         | HadGEM2-ES     |
| Minuteman Missile National Historic Site                              | HadGEM2-AO     | ACCESS1-0      | MIROC-ESM      | MIROC-ESM-CHEM | HadGEM2-ES     |
| Missouri National Recreation River                                    | MIROC-ESM      | ACCESS1-0      | HadGEM2-AO     | MIROC-ESM-CHEM | HadGEM2-ES     |
| Montezuma Castle National Monument                                    | MIROC-ESM-CHEM | MIROC-ESM      | IPSL-CM5A-LR   | HadGEM2-ES     | HadGEM2-AO     |

| <b>Park</b>                                     | <b>Model 1</b> | <b>Model 2</b> | <b>Model 3</b> | <b>Model 4</b> | <b>Model 5</b> |
|-------------------------------------------------|----------------|----------------|----------------|----------------|----------------|
| Monocacy National Battlefield                   | MIROC-ESM      | HadGEM2-ES     | GFDL-CM3       | MIROC-ESM-CHEM | ACCESS1-0      |
| Mount Rainier National Park                     | HadGEM2-AO     | HadGEM2-ES     | HadGEM2-CC     | MIROC-ESM      | MIROC-ESM-CHEM |
| Morristown National Historical Park             | MIROC-ESM      | MIROC-ESM-CHEM | GFDL-CM3       | HadGEM2-ES     | MIROC5         |
| Mount Rushmore National Memorial                | HadGEM2-AO     | ACCESS1-0      | MIROC-ESM      | MIROC-ESM-CHEM | HadGEM2-ES     |
| Muir Woods National Monument                    | MIROC-ESM-CHEM | MIROC-ESM      | IPSL-CM5A-LR   | HadGEM2-ES     | HadGEM2-AO     |
| Natural Bridges National Monument               | MIROC-ESM-CHEM | MIROC-ESM      | GFDL-CM3       | HadGEM2-AO     | IPSL-CM5A-LR   |
| National Capital combined Park                  | MIROC-ESM      | HadGEM2-ES     | GFDL-CM3       | MIROC-ESM-CHEM | ACCESS1-0      |
| Natchez National Historical Park                | MIROC-ESM-CHEM | MIROC5         | HadGEM2-ES     | HadGEM2-CC     | HadGEM2-AO     |
| Natchez Trace Parkway and National Scenic Trail | HadGEM2-ES     | MIROC-ESM-CHEM | ACCESS1-0      | HadGEM2-CC     | HadGEM2-AO     |
| Navajo National Monument                        | MIROC-ESM-CHEM | MIROC-ESM      | HadGEM2-AO     | GFDL-CM3       | IPSL-CM5A-LR   |
| Nez Perce National Historical Park              | HadGEM2-AO     | MIROC-ESM-CHEM | MIROC-ESM      | HadGEM2-ES     | IPSL-CM5A-LR   |
| New River Gorge National River                  | GFDL-CM3       | HadGEM2-ES     | ACCESS1-0      | HadGEM2-CC     | MIROC-ESM      |
| Nicodemus National Historic Site                | MIROC-ESM-CHEM | HadGEM2-ES     | HadGEM2-AO     | ACCESS1-0      | MIROC5         |
| Niobrara National Scenic River                  | ACCESS1-0      | MIROC-ESM      | HadGEM2-AO     | HadGEM2-ES     | MIROC-ESM-CHEM |

| <b>Park</b>                                      | <b>Model 1</b> | <b>Model 2</b> | <b>Model 3</b> | <b>Model 4</b> | <b>Model 5</b> |
|--------------------------------------------------|----------------|----------------|----------------|----------------|----------------|
| Ninety Six National Historic Site                | HadGEM2-ES     | HadGEM2-CC     | MIROC-ESM      | GFDL-CM3       | ACCESS1-0      |
| North Cascades National Park                     | HadGEM2-AO     | HadGEM2-ES     | IPSL-CM5A-LR   | HadGEM2-CC     | MIROC-ESM-CHEM |
| Obed Wild and Scenic River                       | HadGEM2-ES     | GFDL-CM3       | HadGEM2-CC     | ACCESS1-0      | MIROC-ESM      |
| Olympic National Park                            | HadGEM2-AO     | IPSL-CM5A-LR   | HadGEM2-ES     | MIROC-ESM      | HadGEM2-CC     |
| Oregon Caves National Monument                   | IPSL-CM5A-LR   | HadGEM2-ES     | HadGEM2-AO     | MIROC-ESM-CHEM | HadGEM2-CC     |
| Ozark National Scenic Riverway                   | MIROC-ESM-CHEM | MIROC-ESM      | ACCESS1-0      | HadGEM2-ES     | HadGEM2-AO     |
| Palo Alto Battlefield National Historic Site     | IPSL-CM5A-LR   | MIROC-ESM-CHEM | GFDL-CM3       | HadGEM2-ES     | HadGEM2-CC     |
| Pennsylvania Avenue National Historic Site       |                | HadGEM2-ES     |                | MIROC-ESM-CHEM |                |
| National Historic Site                           | MIROC-ESM      | ES             | GFDL-CM3       | ESM-CHEM       | ACCESS1-0      |
| Padre Island National Seashore                   | IPSL-CM5A-LR   | MIROC-ESM-CHEM | GFDL-CM3       | MIROC-ESM      | HadGEM2-ES     |
| Pecos National Historic Park                     | MIROC-ESM-CHEM | IPSL-CM5A-LR   | MIROC-ESM      | GFDL-CM3       | HadGEM2-ES     |
| Petrified Forest National Park                   | MIROC-ESM-CHEM | MIROC-ESM      | IPSL-CM5A-LR   | GFDL-CM3       | HadGEM2-ES     |
| Pea Ridge National Military Park                 | MIROC-ESM-CHEM | ACCESS1-0      | MIROC-ESM      | HadGEM2-ES     | HadGEM2-AO     |
| Petersburg National Battlefield                  | MIROC-ESM      | GFDL-CM3       | ACCESS1-0      | MIROC-ESM-CHEM | HadGEM2-ES     |
| Petroglyph National Monument                     | MIROC-ESM-CHEM | MIROC-ESM      | IPSL-CM5A-LR   | GFDL-CM3       | HadGEM2-ES     |
| Perry's Victory and International Peace Memorial | MIROC-ESM      | MIROC-ESM-CHEM | HadGEM2-ES     | ACCESS1-0      | MIROC5         |

| <b>Park</b>                        | <b>Model 1</b> | <b>Model 2</b> | <b>Model 3</b> | <b>Model 4</b> | <b>Model 5</b> |
|------------------------------------|----------------|----------------|----------------|----------------|----------------|
| Pipestone National Monument        | MIROC-ESM      | ACCESS1-0      | MIROC-ESM-CHEM | HadGEM2-AO     | HadGEM2-ES     |
| Pictured Rocks National Lakeshore  | MIROC-ESM      | MIROC-ESM-CHEM | GFDL-CM3       | HadGEM2-ES     | ACCESS1-0      |
| Piscataway Park                    | MIROC-ESM      | HadGEM2-ES     | GFDL-CM3       | MIROC-ESM-CHEM | ACCESS1-0      |
| Pipe Spring National Monument      | MIROC-ESM-CHEM | MIROC-ESM      | HadGEM2-AO     | HadGEM2-ES     | IPSL-CM5A-LR   |
| Point Reyes National Seashore      | MIROC-ESM-CHEM | MIROC-ESM      | IPSL-CM5A-LR   | HadGEM2-ES     | HadGEM2-AO     |
| Prince William Forest Park         | MIROC-ESM      | HadGEM2-ES     | GFDL-CM3       | MIROC-ESM-CHEM | ACCESS1-0      |
| Rainbow Bridge National Monument   | MIROC-ESM-CHEM | MIROC-ESM      | HadGEM2-AO     | GFDL-CM3       | IPSL-CM5A-LR   |
| Redwood National Park              | HadGEM2-AO     | IPSL-CM5A-LR   | HadGEM2-ES     | MIROC-ESM-CHEM | HadGEM2-CC     |
| Richmond National Battlefield Park | MIROC-ESM      | GFDL-CM3       | MIROC-ESM-CHEM | ACCESS1-0      | HadGEM2-ES     |
| Rock Creek Park Park               | MIROC-ESM      | HadGEM2-ES     | GFDL-CM3       | MIROC-ESM-CHEM | ACCESS1-0      |
| Ross Lake National Recreation Area | HadGEM2-AO     | IPSL-CM5A-LR   | HadGEM2-ES     | HadGEM2-CC     | MIROC-ESM-CHEM |
| Rocky Mountain National Park       | MIROC-ESM-CHEM | HadGEM2-AO     | ACCESS1-0      | IPSL-CM5A-LR   | GFDL-CM3       |
| Roger Williams National Memorial   | MIROC-ESM-CHEM | MIROC-ESM      | GFDL-CM3       | MIROC5         | HadGEM2-ES     |
| Russell Cave National Monument     | HadGEM2-ES     | HadGEM2-CC     | MIROC-ESM      | GFDL-CM3       | ACCESS1-0      |



| <b>Park</b>                                     | <b>Model 1</b> | <b>Model 2</b> | <b>Model 3</b> | <b>Model 4</b> | <b>Model 5</b> |
|-------------------------------------------------|----------------|----------------|----------------|----------------|----------------|
| San Antonio Missions National Historic Park     | IPSL-CM5A-LR   | MIROC-ESM-CHEM | GFDL-CM3       | HadGEM2-ES     | HadGEM2-AO     |
| Saint Croix National Scenic River               | MIROC-ESM      | MIROC-ESM-CHEM | ACCESS1-0      | HadGEM2-ES     | HadGEM2-AO     |
| San Francisco Maritime National Historical Park | MIROC-ESM      | MIROC-ESM-CHEM | IPSL-CM5A-LR   | HadGEM2-AO     | HadGEM2-ES     |
| Saint-Gaudens National Historic Site            | MIROC-ESM-CHEM | GFDL-CM3       | MIROC-ESM      | MIROC5         | ACCESS1-0      |
| Sagamore Hill National Historic Site            | MIROC-ESM-CHEM | MIROC-ESM      | GFDL-CM3       | MIROC5         | IPSL-CM5A-LR   |
| Saugus Iron Works National Historic Site        | MIROC-ESM-CHEM | MIROC-ESM      | GFDL-CM3       | MIROC5         | HadGEM2-ES     |
| San Juan National Historical Site               | IPSL-CM5A-LR   | GFDL-CM3       | MIROC-ESM-CHEM | HadGEM2-ES     | MIROC-ESM      |
| Salem Maritime National Historic Site           | MIROC-ESM-CHEM | MIROC-ESM      | GFDL-CM3       | MIROC5         | HadGEM2-ES     |
| Salinas Pueblo Missions National Monument       | MIROC-ESM-CHEM | MIROC-ESM      | IPSL-CM5A-LR   | HadGEM2-ES     | GFDL-CM3       |
| Saratoga National Historical Park               | MIROC-ESM-CHEM | GFDL-CM3       | MIROC-ESM      | MIROC5         | ACCESS1-0      |
| Scotts Bluff National Monument                  | HadGEM2-AO     | ACCESS1-0      | MIROC-ESM-CHEM | MIROC-ESM      | IPSL-CM5A-LR   |
| Sequoia National Park                           | MIROC-ESM      | MIROC-ESM-CHEM | IPSL-CM5A-LR   | HadGEM2-AO     | HadGEM2-ES     |
| Shenandoah National Park                        | MIROC-ESM      | GFDL-CM3       | HadGEM2-ES     | ACCESS1-0      | MIROC-ESM-CHEM |
| Shiloh National Battlefield                     | HadGEM2-ES     | HadGEM2-AO     | ACCESS1-0      | MIROC-ESM      | MIROC-ESM-CHEM |

| <b>Park</b>                                 | <b>Model 1</b> | <b>Model 2</b> | <b>Model 3</b> | <b>Model 4</b> | <b>Model 5</b> |
|---------------------------------------------|----------------|----------------|----------------|----------------|----------------|
| Sitka National Historical Park              | MIROC-ESM-CHEM | IPSL-CM5A-LR   | MPI-ESM-LR     | MIROC-ESM      | HadGEM2-ES     |
| Sleeping Bear Dunes National Lakeshore      | MIROC-ESM      | MIROC-ESM-CHEM | HadGEM2-ES     | ACCESS1-0      | GFDL-CM3       |
| Springfield Armory National Historic Site   | MIROC-ESM-CHEM | MIROC-ESM      | GFDL-CM3       | MIROC5         | HadGEM2-ES     |
| Steamtown National Historic Site            | MIROC-ESM      | MIROC-ESM-CHEM | GFDL-CM3       | HadGEM2-ES     | ACCESS1-0      |
| Statue Of Liberty National Monument         | MIROC-ESM      | MIROC-ESM-CHEM | GFDL-CM3       | MIROC5         | HadGEM2-ES     |
| Stones River National Battlefield           | HadGEM2-ES     | ACCESS1-0      | MIROC-ESM      | HadGEM2-CC     | HadGEM2-AO     |
| Sunset Crater Volcano National Monument     | MIROC-ESM-CHEM | MIROC-ESM      | IPSL-CM5A-LR   | HadGEM2-ES     | GFDL-CM3       |
| Tallgrass Prairie National Preserve         | MIROC-ESM-CHEM | ACCESS1-0      | MIROC-ESM      | HadGEM2-AO     | MIROC5         |
| Theodore Roosevelt Island National Memorial | MIROC-ESM      | HadGEM2-ES     | GFDL-CM3       | MIROC-ESM-CHEM | ACCESS1-0      |
| Theodore Roosevelt National Park            | MIROC-ESM      | ACCESS1-0      | MIROC-ESM-CHEM | HadGEM2-AO     | HadGEM2-ES     |
| Timpanogos Cave National Monument           | MIROC-ESM-CHEM | MIROC-ESM      | HadGEM2-AO     | GFDL-CM3       | ACCESS1-0      |
| Tumacacori National Historical Park         | IPSL-CM5A-LR   | MIROC-ESM-CHEM | HadGEM2-ES     | HadGEM2-CC     | GFDL-CM3       |
| Tuzigoot National Monument                  | MIROC-ESM-CHEM | MIROC-ESM      | IPSL-CM5A-LR   | GFDL-CM3       | HadGEM2-ES     |
| Ulysses S. Grant National Historic Site     | MIROC-ESM-CHEM | MIROC-ESM      | ACCESS1-0      | HadGEM2-AO     | HadGEM2-ES     |

| <b>Park</b>                                                              | <b>Model 1</b> | <b>Model 2</b> | <b>Model 3</b> | <b>Model 4</b> | <b>Model 5</b> |
|--------------------------------------------------------------------------|----------------|----------------|----------------|----------------|----------------|
| Upper Delaware Scenic and Recreational River                             | MIROC-ESM      | MIROC-ESM-CHEM | GFDL-CM3       | HadGEM2-ES     | ACCESS1-0      |
| Valley Forge National Historical Park                                    | MIROC-ESM      | MIROC-ESM-CHEM | GFDL-CM3       | HadGEM2-ES     | MIROC5         |
| World War II Valor in the Pacific National Monument<br>National Monument | IPSL-CM5A-LR   | GFDL-CM3       | HadGEM2-ES     | HadGEM2-AO     | HadGEM2-CC     |
| Vanderbilt Mansion National Historic Site                                | MIROC-ESM-CHEM | MIROC-ESM      | GFDL-CM3       | MIROC5         | IPSL-CM5A-LR   |
| Vicksburg National Military Park                                         | MIROC-ESM-CHEM | HadGEM2-ES     | MIROC5         | HadGEM2-CC     | HadGEM2-AO     |
| Virgin Islands National Park                                             | IPSL-CM5A-LR   | GFDL-CM3       | MIROC-ESM      | MIROC-ESM-CHEM | HadGEM2-ES     |
| Vietnam Veterans Memorial National Memorial                              | MIROC-ESM      | HadGEM2-ES     | GFDL-CM3       | MIROC-ESM-CHEM | ACCESS1-0      |
| Voyageurs National Park                                                  | MIROC-ESM      | MIROC-ESM-CHEM | GFDL-CM3       | ACCESS1-0      | HadGEM2-ES     |
| Washita Battlefield National Historic Site                               | MIROC-ESM-CHEM | IPSL-CM5A-LR   | HadGEM2-ES     | ACCESS1-0      | MIROC-ESM      |
| Walnut Canyon National Monument                                          | MIROC-ESM-CHEM | MIROC-ESM      | IPSL-CM5A-LR   | HadGEM2-ES     | GFDL-CM3       |
| Weir Farm National Historic Site                                         | MIROC-ESM-CHEM | MIROC-ESM      | GFDL-CM3       | MIROC5         | IPSL-CM5A-LR   |
| Whiskeytown National Recreation Area                                     | HadGEM2-ES     | HadGEM2-AO     | IPSL-CM5A-LR   | HadGEM2-CC     | MIROC-ESM-CHEM |
| Whitman Mission National Historic Site                                   | HadGEM2-AO     | MIROC-ESM-CHEM | MIROC-ESM      | IPSL-CM5A-LR   | HadGEM2-ES     |
| White Sands National Monument                                            | MIROC-ESM-CHEM | IPSL-CM5A-LR   | MIROC-ESM      | HadGEM2-ES     | HadGEM2-CC     |

| <b>Park</b>                                     | <b>Model 1</b> | <b>Model 2</b> | <b>Model 3</b> | <b>Model 4</b> | <b>Model 5</b> |
|-------------------------------------------------|----------------|----------------|----------------|----------------|----------------|
| Wind Cave National Park                         | HadGEM2-AO     | ACCESS1-0      | MIROC-ESM-CHEM | MIROC-ESM      | HadGEM2-ES     |
| Wilson's Creek National Battlefield             | MIROC-ESM-CHEM | ACCESS1-0      | MIROC-ESM      | HadGEM2-ES     | HadGEM2-AO     |
| William Howard Taft National Historic Site      | HadGEM2-ES     | MIROC-ESM      | MIROC-ESM-CHEM | ACCESS1-0      | HadGEM2-AO     |
| Women's Rights National Historical Park         | MIROC-ESM      | MIROC-ESM-CHEM | GFDL-CM3       | HadGEM2-ES     | ACCESS1-0      |
| Wolf Trap National Park for the Performing Arts | MIROC-ESM      | HadGEM2-ES     | GFDL-CM3       | MIROC-ESM-CHEM | ACCESS1-0      |
| Wright Brothers National Memorial               | MIROC-ESM-CHEM | GFDL-CM3       | MIROC-ESM      | IPSL-CM5A-LR   | HadGEM2-ES     |
| Wrangell-St. Elias National Park & Preserve     | GFDL-CM3       | MIROC-ESM-CHEM | HadGEM2-ES     | IPSL-CM5A-LR   | BCC-CSM1-1     |
| Wupatki National Monument                       | MIROC-ESM-CHEM | MIROC-ESM      | IPSL-CM5A-LR   | HadGEM2-ES     | HadGEM2-AO     |
| World War II Memorial National Memorial         | MIROC-ESM      | HadGEM2-ES     | GFDL-CM3       | MIROC-ESM-CHEM | ACCESS1-0      |
| Yellowstone National Park                       | MIROC-ESM-CHEM | MIROC-ESM      | IPSL-CM5A-LR   | HadGEM2-AO     | GFDL-CM3       |
| Yosemite National Park                          | MIROC-ESM      | MIROC-ESM-CHEM | IPSL-CM5A-LR   | GFDL-CM3       | HadGEM2-AO     |
| Zion National Park                              | MIROC-ESM-CHEM | MIROC-ESM      | HadGEM2-AO     | IPSL-CM5A-LR   | HadGEM2-ES     |
