# Supplementary material for: Protected Area Tourism in a Changing Climate: Will Visitation at US National Parks Warm Up or Overheat?
Source: PubMed Central journal article supplement (PMC4470629; doi:10.1371/journal.pone.0128226), 2015-06-17
Supplement: pone.0128226.s008.pdf [file pone.0128226.s008.pdf]

**S3 Table. Generalized linear model output for historical (1979-2013) U.S. National Park System monthly visitation relationship to monthly mean temperature.** The third-order polynomial model was the best-fit model (lowest BIC). Results shown are based on a model that includes park name as a categorical explanatory variable and a quasibinomial error distribution to account for overdispersion, and has 3737 degrees of freedom.

| <b>Parameter</b> | <b>Estimate</b> | <b>Std. Error</b> | <b>z value</b> | <b>p value</b>        |
|------------------|-----------------|-------------------|----------------|-----------------------|
| Intercept        | -3.90E+00       | 1.27E-01          | -30.598        | < 0.0001              |
| Temperature      | 1.55E-01        | 4.39E-03          | 35.189         | < 0.0001              |
| Temperature^2    | -2.29E-03       | 3.78E-04          | -6.06          | < 0.0001              |
| Temperature^3    | -3.18E-05       | 9.67E-06          | -3.283         | 0.001                 |
|                  |                 |                   |                | R <sup>2</sup> = 0.69 |

  

| <b>Model</b>         | <b>ΔBIC</b> |
|----------------------|-------------|
| 3rd-order polynomial | 0           |
| 2nd-order polynomial | 118         |
| Temperature          | 14308       |
| Null model           | 86919       |
