# Supplementary material for: Protected Area Tourism in a Changing Climate: Will Visitation at US National Parks Warm Up or Overheat?
Source: PubMed Central journal article supplement (PMC4470629; doi:10.1371/journal.pone.0128226), 2015-06-17
Supplement: pone.0128226.s009.pdf [file pone.0128226.s009.pdf]

**S4. Table. Linear model relationship between historical monthly visitation and temperature at individual U.S. national parks.**

Output shown from the best-fit (lowest-BIC) model among four models of increasing complexity (a null model [‘Null’], a model including monthly temperature as the single explanatory variable [‘1<sup>st</sup>-order polynomial’], the second-order polynomial equation of temperature [‘2nd-order polynomial’], and the third-order polynomial equation of temperature [‘3rd-order polynomial’])

| Park                                              | Best-fit model       | F-value | P-value | adj. R <sup>2</sup> | Intercept | Temperature | Temperature <sup>2</sup> | Temperature <sup>3</sup> |
|---------------------------------------------------|----------------------|---------|---------|---------------------|-----------|-------------|--------------------------|--------------------------|
| Abraham Lincoln Birthplace National Historic Site | 2nd-order polynomial | 141.8   | <0.0001 | 0.96                | 3832.94   | 515.71      | 36.97                    |                          |
| Acadia National Park                              | 2nd-order polynomial | 77.2    | <0.0001 | 0.93                | 39221.16  | 9351.89     | 1109.86                  |                          |
| Adams National Historical Park                    | 1st-order polynomial | 132.1   | <0.0001 | 0.92                | 1678.92   | 701.45      |                          |                          |
| Agate Fossil Beds National Monument               | 2nd-order polynomial | 255.7   | <0.0001 | 0.98                | 160.96    | 31.78       | 4.67                     |                          |
| Allegheny Portage Railroad National Historic Site | 2nd-order polynomial | 157.9   | <0.0001 | 0.97                | 5112.65   | 348.26      | 6.30                     |                          |
| Amistad National Recreation Area                  | 2nd-order polynomial | 4.6     | 0.0429  | 0.39                | -54498.30 | 14716.77    | -292.94                  |                          |
| Andersonville National Historical Site            | 2nd-order polynomial | 8.1     | 0.0099  | 0.56                | -8370.91  | 2253.57     | -54.76                   |                          |
| Andrew Johnson National Historic Site             | 1st-order polynomial | 10.7    | 0.0085  | 0.47                | 3141.72   | 158.17      |                          |                          |
| Antietam National Battlefield                     | 1st-order polynomial | 50.3    | <0.0001 | 0.82                | 8778.35   | 1529.26     |                          |                          |
| Apostle Islands National Lakeshore                | 3rd-order polynomial | 62.8    | <0.0001 | 0.94                | 1739.52   | -225.66     | 21.66                    | 5.34                     |
| Appomattox Court House National Historical Park   | 1st-order polynomial | 100.6   | <0.0001 | 0.9                 | 1095.94   | 1320.90     |                          |                          |
| Arches National Park                              | 3rd-order polynomial | 110.2   | <0.0001 | 0.97                | 13486.65  | 2744.15     | 292.19                   | -10.74                   |

| Park                                                  | Best-fit model       | F-value | P-value | adj. R <sup>2</sup> | Intercept | Temperature | Temperature <sup>2</sup> | Temperature <sup>3</sup> |
|-------------------------------------------------------|----------------------|---------|---------|---------------------|-----------|-------------|--------------------------|--------------------------|
| Arkansas Post National Memorial                       | 1st-order polynomial | 10.6    | 0.0086  | 0.47                | 2515.57   | 97.28       |                          |                          |
| Arlington House / The Robert E. Lee National Memorial | 1st-order polynomial | 22      | 0.0009  | 0.66                | 13659.77  | 1916.93     |                          |                          |
| Assateague Island National Seashore                   | 3rd-order polynomial | 126.9   | <0.0001 | 0.97                | -17847.60 | 21123.31    | -1690.14                 | 60.78                    |
| Aztec Ruins National Monument                         | 2nd-order polynomial | 140.5   | <0.0001 | 0.96                | 1375.51   | 182.61      | 6.17                     |                          |
| Badlands National Park                                | 3rd-order polynomial | 260.2   | <0.0001 | 0.99                | 10892.75  | 434.65      | 227.00                   | 9.19                     |
| Bandelier National Monument                           | 2nd-order polynomial | 80.4    | <0.0001 | 0.94                | 8513.07   | 2068.42     | -38.09                   |                          |
| Bent's Old Fort National Historic Site                | 2nd-order polynomial | 46.6    | <0.0001 | 0.89                | 987.51    | 89.44       | 5.27                     |                          |
| Big Bend National Park                                | 2nd-order polynomial | 5.3     | 0.0303  | 0.44                | -19170.24 | 5420.51     | -142.84                  |                          |
| Big Cypress National Preserve                         | 1st-order polynomial | 86.9    | <0.0001 | 0.89                | 162496.70 | -4810.77    |                          |                          |
| Big Hole National Battlefield                         | 2nd-order polynomial | 398     | <0.0001 | 0.99                | 549.40    | 193.21      | 29.62                    |                          |
| Big South Fork National River and Recreation Area     | 2nd-order polynomial | 35.9    | <0.0001 | 0.86                | 18516.84  | 5767.89     | -138.57                  |                          |
| Big Thicket National Preserve                         | 1st-order polynomial | 10.6    | 0.0086  | 0.47                | 2878.59   | 219.66      |                          |                          |
| Bighorn Canyon National Recreation Area               | 3rd-order polynomial | 165.6   | <0.0001 | 0.98                | 14451.39  | 950.03      | 80.40                    | -2.17                    |
| Biscayne National Park                                | 1st-order polynomial | 7.4     | 0.0218  | 0.37                | -5538.97  | 1677.77     |                          |                          |

| Park                                               | Best-fit model       | F-value | P-value | adj. R <sup>2</sup> | Intercept | Temperature | Temperature <sup>2</sup> | Temperature <sup>3</sup> |
|----------------------------------------------------|----------------------|---------|---------|---------------------|-----------|-------------|--------------------------|--------------------------|
| Black Canyon of the Gunnison National Park         | 2nd-order polynomial | 646.5   | <0.0001 | 0.99                | 3345.20   | 413.29      | 91.09                    |                          |
| Blue Ridge Parkway                                 | 1st-order polynomial | 42.5    | <0.0001 | 0.79                | 411719.00 | 80432.46    |                          |                          |
| Bluestone National Scenic River                    | 2nd-order polynomial | 46.8    | <0.0001 | 0.89                | 25.52     | -70.92      | 25.01                    |                          |
| Booker T. Washington National Monument             | 1st-order polynomial | 70.5    | <0.0001 | 0.86                | 207.51    | 113.26      |                          |                          |
| Boston African American National Historic Site     | 3rd-order polynomial | 72.3    | <0.0001 | 0.95                | 6229.85   | 1995.17     | -553.84                  | 29.15                    |
| Boston National Historical Park                    | 1st-order polynomial | 155     | <0.0001 | 0.93                | 60348.27  | 11025.08    |                          |                          |
| Brown v. Board of Education National Historic Site | 1st-order polynomial | 6.7     | 0.027   | 0.34                | 1195.47   | 33.13       |                          |                          |
| Bryce Canyon National Park                         | 3rd-order polynomial | 1176.4  | <0.0001 | 0.99                | 16942.58  | 3771.64     | 592.48                   | -20.37                   |
| Buck Island Reef National Monument                 | 1st-order polynomial | 9       | 0.0132  | 0.42                | 17705.03  | -511.00     |                          |                          |
| Buffalo National River                             | 1st-order polynomial | 33      | 0.0002  | 0.74                | -11740.30 | 5797.65     |                          |                          |
| Cabrillo National Monument                         | Null                 |         |         |                     | 95850.15  |             |                          |                          |
| Canaveral National Seashore                        | 1st-order polynomial | 2.6     | 0.1379  | 0.13                | 45590.60  | 1943.18     |                          |                          |
| Cane River Creole National Historical Park         | 2nd-order polynomial | 3       | 0.1026  | 0.26                | -1006.05  | 318.71      | -7.57                    |                          |
| Canyon de Chelly National Monument                 | 1st-order polynomial | 89.4    | <0.0001 | 0.89                | 37245.34  | 2378.13     |                          |                          |
| Canyonlands National Park                          | 3rd-order polynomial | 60.2    | <0.0001 | 0.94                | 5565.61   | 1856.55     | 170.83                   | -8.15                    |

| Park                                      | Best-fit model       | F-value | P-value | adj. R <sup>2</sup> | Intercept  | Temperature | Temperature <sup>2</sup> | Temperature <sup>3</sup> |
|-------------------------------------------|----------------------|---------|---------|---------------------|------------|-------------|--------------------------|--------------------------|
| Cape Cod National Seashore                | 2nd-order polynomial | 86.1    | <0.0001 | 0.94                | 127405.00  | -2673.46    | 1539.34                  |                          |
| Cape Hatteras National Seashore           | 3rd-order polynomial | 199.2   | <0.0001 | 0.98                | -132858.20 | 36694.21    | -2054.61                 | 52.02                    |
| Cape Lookout National Seashore            | 1st-order polynomial | 97.9    | <0.0001 | 0.9                 | -4728.08   | 2073.64     |                          |                          |
| Capitol Reef National Park                | 3rd-order polynomial | 136     | <0.0001 | 0.97                | 12873.04   | 3471.34     | 314.85                   | -17.08                   |
| Capulin Volcano National Monument         | 3rd-order polynomial | 57.7    | <0.0001 | 0.94                | 816.69     | 550.19      | -76.87                   | 3.57                     |
| Carl Sandburg Home National Historic Site | 2nd-order polynomial | 21.3    | 0.0004  | 0.79                | -1094.73   | 564.38      | -11.15                   |                          |
| Carlsbad Caverns National Park            | 3rd-order polynomial | 26.4    | 0.0002  | 0.87                | -72542.02  | 24773.43    | -1797.12                 | 42.32                    |
| Casa Grande Ruins National Monument       | 1st-order polynomial | 12      | 0.0061  | 0.5                 | 22010.09   | -522.53     |                          |                          |
| Castillo de San Marcos National Monument  | Null                 |         |         |                     | 56967.07   |             |                          |                          |
| Castle Clinton National Monument          | 3rd-order polynomial | 83.3    | <0.0001 | 0.96                | 100818.50  | 24295.40    | -1902.65                 | 58.59                    |
| Catoctin Mountain Park                    | 2nd-order polynomial | 41.4    | <0.0001 | 0.88                | 19918.81   | 2744.33     | -57.28                   |                          |
| Cedar Breaks National Monument            | 2nd-order polynomial | 34.1    | <0.0001 | 0.86                | 7608.60    | 1119.84     | 191.40                   |                          |
| Chaco Culture National Historical Park    | 2nd-order polynomial | 39.4    | <0.0001 | 0.87                | 1393.81    | 553.15      | -12.27                   |                          |
| Chamizal National Memorial                | 3rd-order polynomial | 22.8    | 0.0003  | 0.86                | -46608.17  | 11595.75    | -743.75                  | 15.31                    |

| Park                                               | Best-fit model       | F-value | P-value | adj. R <sup>2</sup> | Intercept | Temperature | Temperature <sup>2</sup> | Temperature <sup>3</sup> |
|----------------------------------------------------|----------------------|---------|---------|---------------------|-----------|-------------|--------------------------|--------------------------|
| Channel Islands National Park                      | 1st-order polynomial | 22      | 0.0009  | 0.66                | -15223.50 | 2758.12     |                          |                          |
| Charles Pinckney National Historic Site            | 2nd-order polynomial | 8.7     | 0.0079  | 0.58                | -1220.55  | 404.17      | -8.86                    |                          |
| Chattahoochee River National Recreation Area       | 1st-order polynomial | 27.2    | 0.0004  | 0.7                 | 109650.00 | 5101.92     |                          |                          |
| Chesapeake and Ohio Canal National Historic Park   | 2nd-order polynomial | 254.3   | <0.0001 | 0.98                | 104387.70 | 21534.55    | -339.05                  |                          |
| Chickamauga and Chattanooga National Military Park | 1st-order polynomial | 113.7   | <0.0001 | 0.91                | 45792.36  | 2279.52     |                          |                          |
| Chickasaw National Recreation Area                 | 1st-order polynomial | 51.7    | <0.0001 | 0.82                | -6774.17  | 7948.53     |                          |                          |
| Chiricahua National Monument                       | 2nd-order polynomial | 3.3     | 0.0863  | 0.29                | -809.44   | 1035.17     | -33.00                   |                          |
| Christiansted National Historic Site               | 1st-order polynomial | 32.9    | 0.0002  | 0.74                | 21532.67  | -469.19     |                          |                          |
| City of Rocks National Reserve                     | 3rd-order polynomial | 45.5    | <0.0001 | 0.92                | 1300.08   | 139.08      | 106.89                   | -4.44                    |
| Clara Barton National Historic Site                | 1st-order polynomial | 11.4    | 0.007   | 0.49                | 862.85    | 34.36       |                          |                          |
| Colonial National Historical Park                  | 2nd-order polynomial | 52.6    | <0.0001 | 0.9                 | 53866.71  | 23123.59    | -399.19                  |                          |
| Colorado National Monument                         | 3rd-order polynomial | 55.5    | <0.0001 | 0.94                | 16904.89  | 1241.96     | 53.52                    | -2.77                    |
| Congaree National Park                             | 2nd-order polynomial | 15.8    | 0.0011  | 0.73                | -3057.69  | 1280.55     | -35.99                   |                          |
| Coronado National Memorial                         | Null                 |         |         |                     | 6422.06   |             |                          |                          |
| Cowpens National Battlefield                       | 1st-order polynomial | 13.5    | 0.0043  | 0.53                | 8151.96   | 316.25      |                          |                          |

| Park                                              | Best-fit model       | F-value | P-value | adj. R <sup>2</sup> | Intercept | Temperature | Temperature <sup>2</sup> | Temperature <sup>3</sup> |
|---------------------------------------------------|----------------------|---------|---------|---------------------|-----------|-------------|--------------------------|--------------------------|
| Crater Lake National Park                         | 2nd-order polynomial | 409.7   | <0.0001 | 0.99                | 6007.69   | -622.37     | 386.52                   |                          |
| Craters of the Moon National Monument             | 2nd-order polynomial | 609.2   | <0.0001 | 0.99                | 2998.53   | 569.78      | 82.00                    |                          |
| Cumberland Gap National Historical Park           | 2nd-order polynomial | 61.7    | <0.0001 | 0.92                | 23511.03  | 5674.61     | -94.06                   |                          |
| Cumberland Island National Seashore               | 2nd-order polynomial | 3       | 0.1006  | 0.27                | -7375.75  | 1063.88     | -23.50                   |                          |
| Curecanti National Recreation Area                | 2nd-order polynomial | 714.9   | <0.0001 | 0.99                | 45632.73  | 6229.90     | 347.45                   |                          |
| Cuyahoga Valley National Park                     | 3rd-order polynomial | 19.3    | 0.0005  | 0.83                | 120414.40 | -4400.39    | 1104.46                  | -29.39                   |
| Dayton Aviation Heritage National Historical Park | 1st-order polynomial | 40.3    | <0.0001 | 0.78                | 1068.18   | 290.20      |                          |                          |
| De Soto National Memorial                         | 1st-order polynomial | 9.4     | 0.0119  | 0.43                | 41301.15  | -968.84     |                          |                          |
| Death Valley National Park                        | 3rd-order polynomial | 5.3     | 0.0264  | 0.54                | -55171.40 | 24694.01    | -1381.41                 | 23.59                    |
| Delaware Water Gap National Recreation Area       | 1st-order polynomial | 151.9   | <0.0001 | 0.93                | 211318.50 | 12728.91    |                          |                          |
| Denali National Park & Preserve                   | 3rd-order polynomial | 101.2   | <0.0001 | 0.96                | 15830.32  | 4702.54     | 419.85                   | 11.56                    |
| Devils Postpile National Monument                 | 2nd-order polynomial | 44.6    | <0.0001 | 0.89                | -172.80   | -179.13     | 142.78                   |                          |
| Devils Tower National Monument                    | 2nd-order polynomial | 242.7   | <0.0001 | 0.98                | -967.74   | -18.36      | 210.39                   |                          |
| Dinosaur National Monument                        | 2nd-order polynomial | 243.1   | <0.0001 | 0.98                | 7858.83   | 1182.58     | 119.09                   |                          |
| Dry Tortugas National Park                        | Null                 |         |         |                     | 3400.37   |             |                          |                          |

| Park                                     | Best-fit model       | F-value | P-value | adj. R <sup>2</sup> | Intercept | Temperature | Temperature <sup>2</sup> | Temperature <sup>3</sup> |
|------------------------------------------|----------------------|---------|---------|---------------------|-----------|-------------|--------------------------|--------------------------|
| Edgar Allan Poe National Historic Site   | 1st-order polynomial | 9.5     | 0.0116  | 0.44                | 774.92    | 24.36       |                          |                          |
| Edison National Historic Site            | 3rd-order polynomial | 5       | 0.0307  | 0.52                | 2886.77   | 374.33      | -40.69                   | 1.19                     |
| Effigy Mounds National Monument          | 1st-order polynomial | 15.5    | 0.0028  | 0.57                | 3927.84   | 388.97      |                          |                          |
| Eisenhower National Historic Site        | 1st-order polynomial | 92.9    | <0.0001 | 0.89                | 710.22    | 622.57      |                          |                          |
| El Malpais National Monument             | 2nd-order polynomial | 110.5   | <0.0001 | 0.95                | 3548.79   | 666.94      | -9.30                    |                          |
| El Morro National Monument               | 2nd-order polynomial | 52.5    | <0.0001 | 0.9                 | 2480.52   | 348.37      | -6.01                    |                          |
| Eleanor Roosevelt National Historic Site | 1st-order polynomial | 31.1    | 0.0002  | 0.73                | 1442.34   | 343.22      |                          |                          |
| Everglades National Park                 | 1st-order polynomial | 30      | 0.0003  | 0.73                | 278181.30 | -8077.70    |                          |                          |
| Federal Hall National Memorial           | 3rd-order polynomial | 28.1    | 0.0001  | 0.88                | 9498.33   | 1371.27     | -129.26                  | 4.14                     |
| Fire Island National Seashore            | 3rd-order polynomial | 131.6   | <0.0001 | 0.97                | 2683.62   | 4398.44     | -642.95                  | 30.82                    |
| Florissant Fossil Beds National Monument | 3rd-order polynomial | 356     | <0.0001 | 0.99                | 2765.91   | 264.54      | 9.79                     | 1.99                     |
| Ford's Theatre National Historic Site    | 2nd-order polynomial | 2.6     | 0.1256  | 0.23                | 5119.85   | 10188.64    | -301.01                  |                          |
| Fort Bowie National Historic Site        | 3rd-order polynomial | 6.7     | 0.0141  | 0.61                | -1114.79  | 399.82      | -23.68                   | 0.41                     |
| Fort Caroline National Memorial          | 3rd-order polynomial | 6       | 0.0189  | 0.58                | -56554.49 | 10971.68    | -531.68                  | 8.19                     |

| Park                                               | Best-fit model       | F-value | P-value | adj. R <sup>2</sup> | Intercept  | Temperature | Temperature <sup>2</sup> | Temperature <sup>3</sup> |
|----------------------------------------------------|----------------------|---------|---------|---------------------|------------|-------------|--------------------------|--------------------------|
| Fort Davis National Historic Site                  | 3rd-order polynomial | 4.3     | 0.0439  | 0.47                | -16450.21  | 3917.24     | -218.59                  | 3.86                     |
| Fort Donelson National Battlefield                 | 1st-order polynomial | 74.5    | <0.0001 | 0.87                | 12591.93   | 557.09      |                          |                          |
| Fort Frederica National Monument                   | 3rd-order polynomial | 3.1     | 0.0899  | 0.36                | -134592.00 | 24280.70    | -1196.60                 | 19.17                    |
| Fort Laramie National Historic Site                | 2nd-order polynomial | 209.1   | <0.0001 | 0.97                | 662.92     | 59.15       | 29.38                    |                          |
| Fort Larned National Historic Site                 | 1st-order polynomial | 100.4   | <0.0001 | 0.9                 | 941.85     | 181.22      |                          |                          |
| Fort Matanzas National Monument                    | 1st-order polynomial | 11.9    | 0.0062  | 0.5                 | 6625.35    | 1737.40     |                          |                          |
| Fort McHenry National Monument and Historic Shrine | 1st-order polynomial | 98.8    | <0.0001 | 0.9                 | 22287.22   | 2389.99     |                          |                          |
| Fort Necessity National Battlefield                | 1st-order polynomial | 90.3    | <0.0001 | 0.89                | 2355.27    | 936.24      |                          |                          |
| Fort Point National Historic Site                  | 1st-order polynomial | 34      | 0.0002  | 0.75                | 14192.92   | 7026.51     |                          |                          |
| Fort Pulaski National Monument                     | 1st-order polynomial | 10.9    | 0.0079  | 0.47                | 11240.99   | 926.38      |                          |                          |
| Fort Raleigh National Historical Site              | 2nd-order polynomial | 30.8    | <0.0001 | 0.84                | 25327.78   | -4194.64    | 212.30                   |                          |
| Fort Scott National Historic Site                  | 1st-order polynomial | 13.4    | 0.0044  | 0.53                | 547.32     | 254.11      |                          |                          |
| Fort Smith National Historic Site                  | 1st-order polynomial | 52.6    | <0.0001 | 0.82                | 1471.85    | 372.44      |                          |                          |
| Fort Stanwix National Monument                     | 3rd-order polynomial | 13      | 0.0019  | 0.77                | 2757.04    | -76.86      | -52.08                   | 4.90                     |



| Park                                                   | Best-fit model       | F-value | P-value | adj. R <sup>2</sup> | Intercept | Temperature | Temperature <sup>2</sup> | Temperature <sup>3</sup> |
|--------------------------------------------------------|----------------------|---------|---------|---------------------|-----------|-------------|--------------------------|--------------------------|
| Fort Sumter National Monument                          | 1st-order polynomial | 13.4    | 0.0044  | 0.53                | 2530.45   | 2003.87     |                          |                          |
| Fort Union National Monument                           | 3rd-order polynomial | 59.9    | <0.0001 | 0.94                | 398.38    | 134.11      | -10.68                   | 0.45                     |
| Fort Union Trading Post National Historic Site         | 2nd-order polynomial | 31.5    | <0.0001 | 0.85                | 185.55    | 74.41       | 7.00                     |                          |
| Fort Vancouver National Historic Site                  | 1st-order polynomial | 17.3    | 0.002   | 0.6                 | 3137.88   | 2974.62     |                          |                          |
| Fort Washington Park                                   | 2nd-order polynomial | 27.3    | 0.0002  | 0.83                | 4479.45   | 2374.20     | -40.92                   |                          |
| Fossil Butte National Monument                         | 2nd-order polynomial | 286.4   | <0.0001 | 0.98                | 282.89    | 93.48       | 9.91                     |                          |
| Franklin Delano Roosevelt Memorial National Memorial   | 2nd-order polynomial | 5.4     | 0.0282  | 0.45                | -48362.64 | 46016.33    | -1366.65                 |                          |
| Frederick Douglass National Historic Site              | 1st-order polynomial | 3.5     | 0.0914  | 0.18                | 2133.63   | 89.79       |                          |                          |
| Fredericksburg and Spotsylvania National Military Park | 1st-order polynomial | 68.4    | <0.0001 | 0.86                | 29148.53  | 1296.36     |                          |                          |
| Friendship Hill National Historic Site                 | 3rd-order polynomial | 6.4     | 0.0163  | 0.59                | 528.94    | -196.59     | 58.86                    | -2.13                    |
| Gateway National Recreation Area                       | 3rd-order polynomial | 292.3   | <0.0001 | 0.99                | 147554.40 | 48135.67    | -4752.53                 | 211.26                   |
| Gauley River National Recreation Area                  | 1st-order polynomial | 2.9     | 0.1189  | 0.15                | 3319.27   | 933.70      |                          |                          |
| General Grant National Memorial                        | 3rd-order polynomial | 15.5    | 0.0011  | 0.8                 | 1821.07   | 1145.40     | -98.05                   | 2.76                     |
| George Rogers Clark National Historical Park           | 1st-order polynomial | 4       | 0.0731  | 0.21                | 2520.12   | 614.93      |                          |                          |

| Park                                           | Best-fit model       | F-value | P-value | adj. R <sup>2</sup> | Intercept | Temperature | Temperature <sup>2</sup> | Temperature <sup>3</sup> |
|------------------------------------------------|----------------------|---------|---------|---------------------|-----------|-------------|--------------------------|--------------------------|
| George Washington Birthplace National Monument | 1st-order polynomial | 58.1    | <0.0001 | 0.84                | 2356.60   | 583.35      |                          |                          |
| George Washington Carver National Monument     | 1st-order polynomial | 61.1    | <0.0001 | 0.85                | 975.55    | 240.09      |                          |                          |
| George Washington Memorial Parkway             | 2nd-order polynomial | 24.4    | 0.0002  | 0.81                | 191394.60 | 42858.54    | -782.54                  |                          |
| Gettysburg National Military Park              | 1st-order polynomial | 90.6    | <0.0001 | 0.89                | 27237.60  | 7737.48     |                          |                          |
| Gila Cliff Dwellings National Monument         | 3rd-order polynomial | 19.8    | 0.0005  | 0.84                | -138.28   | 1071.69     | -101.65                  | 3.25                     |
| Glacier Bay National Park & Preserve           | 3rd-order polynomial | 109.6   | <0.0001 | 0.97                | 2650.24   | 4702.55     | 519.27                   | -33.01                   |
| Glacier National Park                          | 3rd-order polynomial | 960.7   | <0.0001 | 0.99                | 28247.20  | 9302.49     | 1557.36                  | 85.79                    |
| Glen Canyon National Recreation Area           | 2nd-order polynomial | 226.6   | <0.0001 | 0.98                | 51154.33  | 6791.90     | 326.95                   |                          |
| Golden Gate National Recreation Area           | 1st-order polynomial | 97      | <0.0001 | 0.9                 | 396508.70 | 62916.37    |                          |                          |
| Golden Spike National Historic Site            | 1st-order polynomial | 36.7    | 0.0001  | 0.76                | 1124.24   | 297.10      |                          |                          |
| Governors Island National Monument             | 2nd-order polynomial | 77.5    | <0.0001 | 0.93                | 570.70    | -1277.54    | 140.21                   |                          |
| Grand Canyon National Park                     | 1st-order polynomial | 324.3   | <0.0001 | 0.97                | 66033.24  | 19579.11    |                          |                          |
| Grand Portage National Monument                | 3rd-order polynomial | 32.2    | <0.0001 | 0.89                | 860.54    | 15.01       | 20.12                    | 1.83                     |
| Grand Teton National Park                      | 2nd-order polynomial | 376.6   | <0.0001 | 0.99                | 40894.46  | 12233.94    | 1487.52                  |                          |

| Park                                       | Best-fit model       | F-value | P-value | adj. R <sup>2</sup> | Intercept | Temperature | Temperature <sup>2</sup> | Temperature <sup>3</sup> |
|--------------------------------------------|----------------------|---------|---------|---------------------|-----------|-------------|--------------------------|--------------------------|
| Grant-Kohrs Ranch National Historic Site   | 2nd-order polynomial | 647.3   | <0.0001 | 0.99                | 308.05    | 49.95       | 12.22                    |                          |
| Great Basin National Park                  | 2nd-order polynomial | 374.2   | <0.0001 | 0.99                | 1826.10   | 407.67      | 10.18                    |                          |
| Great Sand Dunes National Park             | 2nd-order polynomial | 93.7    | <0.0001 | 0.94                | 4719.53   | 901.68      | 94.56                    |                          |
| Great Smoky Mountains National Park        | 1st-order polynomial | 57.8    | <0.0001 | 0.84                | 144206.50 | 46971.25    |                          |                          |
| Greenbelt Park                             | 1st-order polynomial | 116.5   | <0.0001 | 0.91                | 6530.74   | 1006.24     |                          |                          |
| Guadalupe Mountains National Park          | 3rd-order polynomial | 9.8     | 0.0047  | 0.71                | -24798.29 | 7641.73     | -432.30                  | 7.64                     |
| Guilford Courthouse National Military Park | 3rd-order polynomial | 17.9    | 0.0007  | 0.82                | 6747.23   | 4545.27     | -273.81                  | 5.53                     |
| Gulf Islands National Seashore             | 1st-order polynomial | 35.7    | 0.0001  | 0.76                | -64558.59 | 21423.26    |                          |                          |
| Hagerman Fossil Beds National Monument     | 1st-order polynomial | 42.2    | <0.0001 | 0.79                | 287.75    | 117.78      |                          |                          |
| Haleakala National Park                    | 1st-order polynomial | 21.5    | 0.0009  | 0.65                | -41045.18 | 6395.62     |                          |                          |
| Hamilton Grange National Memorial          | 2nd-order polynomial | 18.7    | 0.0006  | 0.76                | 1164.88   | 136.73      | -4.83                    |                          |
| Hampton National Historic Site             | 1st-order polynomial | 3.1     | 0.1093  | 0.16                | 2297.19   | 61.27       |                          |                          |
| Harpers Ferry National Historical Park     | 2nd-order polynomial | 28.6    | 0.0001  | 0.83                | 694.47    | 4084.69     | -72.01                   |                          |
| Harry S. Truman National Historic Site     | 2nd-order polynomial | 160.6   | <0.0001 | 0.97                | 1838.82   | 164.73      | 5.25                     |                          |

| Park                                                 | Best-fit model       | F-value | P-value | adj. R <sup>2</sup> | Intercept  | Temperature | Temperature <sup>2</sup> | Temperature <sup>3</sup> |
|------------------------------------------------------|----------------------|---------|---------|---------------------|------------|-------------|--------------------------|--------------------------|
| Hawai'i Volcanoes National Park                      | 2nd-order polynomial | 6.6     | 0.0175  | 0.5                 | 2209443.00 | -214686.60  | 5475.40                  |                          |
| Herbert Hoover National Historic Site                | 2nd-order polynomial | 35.1    | <0.0001 | 0.86                | 10995.88   | 150.25      | 23.91                    |                          |
| Home of Franklin D. Roosevelt National Historic Site | 1st-order polynomial | 42.8    | <0.0001 | 0.79                | 5460.35    | 844.45      |                          |                          |
| Homestead National Monument                          | 1st-order polynomial | 36.2    | 0.0001  | 0.76                | 1731.81    | 174.88      |                          |                          |
| Hopewell Culture National Historical Park            | 1st-order polynomial | 92.2    | <0.0001 | 0.89                | 529.17     | 234.06      |                          |                          |
| Hopewell Furnace National Historic Site              | 1st-order polynomial | 172.3   | <0.0001 | 0.94                | 3584.51    | 391.16      |                          |                          |
| Horseshoe Bend National Military Park                | 2nd-order polynomial | 9.8     | 0.0056  | 0.61                | -1135.05   | 818.16      | -18.62                   |                          |
| Hot Springs National Park                            | 1st-order polynomial | 153.4   | <0.0001 | 0.93                | 35489.01   | 4389.09     |                          |                          |
| Hovenweep National Monument                          | 3rd-order polynomial | 68.1    | <0.0001 | 0.95                | 291.91     | 110.82      | 10.74                    | -0.42                    |
| Hubbell Trading Post National Historic Site          | 3rd-order polynomial | 74.9    | <0.0001 | 0.95                | 5847.24    | 450.32      | 55.83                    | -2.29                    |
| Independence National Historical Park                | 1st-order polynomial | 70.1    | <0.0001 | 0.86                | 124859.90  | 13793.50    |                          |                          |
| Indiana Dunes National Lakeshore                     | 3rd-order polynomial | 142.1   | <0.0001 | 0.97                | 67939.05   | 4182.25     | -161.58                  | 19.26                    |
| Isle Royale National Park                            | 3rd-order polynomial | 88.3    | <0.0001 | 0.96                | -116.80    | -73.79      | 6.84                     | 1.01                     |
| James A Garfield National Historic Site              | 2nd-order polynomial | 28.2    | 0.0001  | 0.83                | 822.99     | 28.43       | 3.81                     |                          |

| Park                                                    | Best-fit model       | F-value | P-value | adj. R <sup>2</sup> | Intercept  | Temperature | Temperature <sup>2</sup> | Temperature <sup>3</sup> |
|---------------------------------------------------------|----------------------|---------|---------|---------------------|------------|-------------|--------------------------|--------------------------|
| Jean Lafitte National Historical Park and Preserve      | Null                 |         |         |                     | 55256.64   |             |                          |                          |
| Jefferson National Expansion Memorial National Memorial | 3rd-order polynomial | 13.5    | 0.0017  | 0.77                | 10449.77   | 48054.09    | -4887.69                 | 144.38                   |
| Jewel Cave National Monument                            | 3rd-order polynomial | 205.5   | <0.0001 | 0.98                | 534.39     | 39.78       | 19.85                    | 3.70                     |
| Jimmy Carter National Historic Site                     | 2nd-order polynomial | 8.5     | 0.0085  | 0.58                | -5391.05   | 1196.59     | -31.46                   |                          |
| John D. Rockefeller, Jr. Memorial Parkway               | 2nd-order polynomial | 477     | <0.0001 | 0.99                | 9930.38    | 7464.59     | 959.52                   |                          |
| John Day Fossil Beds National Monument                  | 1st-order polynomial | 273.9   | <0.0001 | 0.96                | 2407.82    | 922.37      |                          |                          |
| John F. Kennedy Center for Performing Arts              | 2nd-order polynomial | 3.9     | 0.0605  | 0.34                | 201747.60  | 14617.79    | -430.51                  |                          |
| John Fitzgerald Kennedy National Historic Site          | 1st-order polynomial | 84.4    | <0.0001 | 0.88                | 336.80     | 86.21       |                          |                          |
| John Muir National Historic Site                        | 2nd-order polynomial | 3.7     | 0.0674  | 0.33                | -9288.97   | 1632.34     | -54.43                   |                          |
| Johnstown Flood National Memorial                       | 1st-order polynomial | 246.7   | <0.0001 | 0.96                | 3821.07    | 551.25      |                          |                          |
| Joshua Tree National Park                               | 3rd-order polynomial | 8.6     | 0.0069  | 0.67                | -471694.20 | 93487.53    | -4537.80                 | 66.80                    |
| Kalaupapa National Historical Park                      | Null                 |         |         |                     | 5111.93    |             |                          |                          |
| Kaloko-Honokohau National Historical Park               | Null                 |         |         |                     | 6453.96    |             |                          |                          |
| Katmai National Park & Preserve                         | 3rd-order polynomial | 51.4    | <0.0001 | 0.93                | 357.25     | -11.47      | 41.87                    | 6.13                     |
| Kenai Fjords National Park                              | 2nd-order polynomial | 299.2   | <0.0001 | 0.98                | 1062.40    | 2021.56     | 310.83                   |                          |

| Park                                               | Best-fit model       | F-value | P-value | adj. R <sup>2</sup> | Intercept | Temperature | Temperature <sup>2</sup> | Temperature <sup>3</sup> |
|----------------------------------------------------|----------------------|---------|---------|---------------------|-----------|-------------|--------------------------|--------------------------|
| Kennesaw Mountain National Battlefield Park        | 2nd-order polynomial | 19.9    | 0.0005  | 0.77                | -2558.84  | 10755.81    | -251.53                  |                          |
| Kings Canyon National Park                         | 2nd-order polynomial | 411.7   | <0.0001 | 0.99                | 21020.27  | 3102.06     | 208.79                   |                          |
| Kings Mountain National Military Park              | 2nd-order polynomial | 82.1    | <0.0001 | 0.94                | 3324.02   | 1808.79     | -38.79                   |                          |
| Klondike Gold Rush National Historical Park (AK)   | 2nd-order polynomial | 172.4   | <0.0001 | 0.97                | 24569.82  | 7303.35     | 438.60                   |                          |
| Klondike Gold Rush National Historical Park (WA)   | 3rd-order polynomial | 215.1   | <0.0001 | 0.98                | -603.83   | 1111.94     | -93.01                   | 3.67                     |
| Knife River Indian Villages National Historic Site | 2nd-order polynomial | 163.4   | <0.0001 | 0.97                | 358.19    | 84.68       | 5.65                     |                          |
| Korean War Veterans Memorial National Memorial     | 2nd-order polynomial | 9.2     | 0.0067  | 0.6                 | -4557.37  | 36624.43    | -995.61                  |                          |
| Lake Chelan National Recreation Area               | 3rd-order polynomial | 1249.3  | <0.0001 | 0.99                | 1305.70   | 233.39      | 22.00                    | 0.47                     |
| Lake Clark National Park & Preserve                | 2nd-order polynomial | 28.2    | 0.0001  | 0.83                | 506.08    | 97.16       | 6.57                     |                          |
| Lake Mead National Recreation Area                 | 2nd-order polynomial | 32      | <0.0001 | 0.85                | 170250.60 | 39729.03    | -594.82                  |                          |
| Lake Meredith National Recreation Area             | 1st-order polynomial | 37.9    | 0.0001  | 0.77                | 21175.32  | 6128.08     |                          |                          |
| Lake Roosevelt National Recreation Area            | 3rd-order polynomial | 592     | <0.0001 | 0.99                | 32991.06  | 2798.27     | -328.22                  | 43.04                    |
| Lassen Volcanic National Park                      | 2nd-order polynomial | 159     | <0.0001 | 0.97                | 14733.12  | -2645.39    | 344.09                   |                          |
| Lava Beds National Monument                        | 2nd-order polynomial | 247.3   | <0.0001 | 0.98                | 4074.80   | 282.53      | 19.89                    |                          |

| Park                                                                  | Best-fit model       | F-value | P-value | adj. R <sup>2</sup> | Intercept | Temperature | Temperature <sup>2</sup> | Temperature <sup>3</sup> |
|-----------------------------------------------------------------------|----------------------|---------|---------|---------------------|-----------|-------------|--------------------------|--------------------------|
| Lewis and Clark National Historical Trail                             | 3rd-order polynomial | 41.8    | <0.0001 | 0.92                | -64863.48 | 22666.80    | -2292.80                 | 81.13                    |
| Lincoln Boyhood National Memorial                                     | 2nd-order polynomial | 61      | <0.0001 | 0.92                | 2570.69   | 166.49      | 36.81                    |                          |
| Lincoln Home National Historic Site                                   | 1st-order polynomial | 47.6    | <0.0001 | 0.81                | 10600.42  | 2011.96     |                          |                          |
| Lincoln Memorial National Memorial                                    | 2nd-order polynomial | 14.4    | 0.0016  | 0.71                | 48543.54  | 28547.64    | -612.43                  |                          |
| Little Bighorn Battlefield National Monument                          | 2nd-order polynomial | 237.8   | <0.0001 | 0.98                | 1841.75   | 575.09      | 131.65                   |                          |
| Little River Canyon National Preserve                                 | 1st-order polynomial | 42.1    | <0.0001 | 0.79                | 3399.28   | 836.22      |                          |                          |
| Little Rock Central High School National Historic Site                | 3rd-order polynomial | 8.2     | 0.0079  | 0.66                | -3041.04  | 1212.27     | -63.19                   | 1.07                     |
| Longfellow National Historic Site                                     | 1st-order polynomial | 132.8   | <0.0001 | 0.92                | 538.69    | 160.40      |                          |                          |
| Lowell National Historical Park                                       | 3rd-order polynomial | 6.5     | 0.0151  | 0.6                 | 34272.78  | 2940.09     | -931.22                  | 47.10                    |
| Lyndon B. Johnson National Historic Park                              | 2nd-order polynomial | 2.5     | 0.1354  | 0.22                | -11098.04 | 2905.79     | -71.44                   |                          |
| Lyndon Baines Johnson Memorial Grove on the Potomac National Memorial | 1st-order polynomial | 60.1    | <0.0001 | 0.84                | 34238.86  | 1095.39     |                          |                          |
| Maggie L. Walker National Historic Site National Historic Site        | Null                 |         |         |                     | 679.21    |             |                          |                          |
| Mammoth Cave National Park                                            | 3rd-order polynomial | 73.1    | <0.0001 | 0.95                | 24799.62  | 14230.44    | -1060.78                 | 32.49                    |
| Manassas National Battlefield Park                                    | 2nd-order polynomial | 13      | 0.0022  | 0.69                | 10768.06  | 6343.07     | -141.97                  |                          |

| Park                                                     | Best-fit model       | F-value | P-value | adj. R <sup>2</sup> | Intercept | Temperature | Temperature <sup>2</sup> | Temperature <sup>3</sup> |
|----------------------------------------------------------|----------------------|---------|---------|---------------------|-----------|-------------|--------------------------|--------------------------|
| Manzanar National Historic Site                          | 3rd-order polynomial | 29.4    | 0.0001  | 0.89                | 2307.58   | 1166.23     | -114.26                  | 4.06                     |
| Marsh-Billings-Rockefeller National Historical Park      | 1st-order polynomial | 9.5     | 0.0116  | 0.44                | 1770.37   | 150.30      |                          |                          |
| Martin Luther King, Jr. National Historic Site           | 2nd-order polynomial | 9.8     | 0.0055  | 0.62                | 171511.00 | -18466.55   | 612.06                   |                          |
| Martin Van Buren National Historic Site                  | 1st-order polynomial | 22.7    | 0.0008  | 0.66                | 260.61    | 105.13      |                          |                          |
| Mary McLeod Bethune Council House National Historic Site | Null                 |         |         |                     | 870.31    |             |                          |                          |
| Mesa Verde National Park                                 | 2nd-order polynomial | 737.2   | <0.0001 | 0.99                | 5430.68   | 887.89      | 233.47                   |                          |
| Minute Man National Historical Park                      | 2nd-order polynomial | 43.4    | <0.0001 | 0.89                | 41065.69  | 6533.23     | -128.05                  |                          |
| Minuteman Missile National Historic Site                 | 2nd-order polynomial | 109.9   | <0.0001 | 0.95                | -56.84    | 4.33        | 16.94                    |                          |
| Missouri National Recreation River                       | 2nd-order polynomial | 175.1   | <0.0001 | 0.97                | 4530.40   | 404.62      | 18.42                    |                          |
| Mojave National Preserve                                 | 2nd-order polynomial | 3.2     | 0.0915  | 0.28                | 23774.24  | 2717.06     | -75.46                   |                          |
| Monocacy National Battlefield                            | 1st-order polynomial | 93.6    | <0.0001 | 0.89                | 944.47    | 67.04       |                          |                          |
| Montezuma Castle National Monument                       | 3rd-order polynomial | 7.5     | 0.0105  | 0.64                | -21385.71 | 14662.27    | -786.67                  | 13.36                    |
| Moore's Creek National Battlefield                       | 1st-order polynomial | 9.3     | 0.0122  | 0.43                | 2663.77   | 121.64      |                          |                          |
| Morristown National Historical Park                      | 2nd-order polynomial | 63.7    | <0.0001 | 0.92                | 25682.30  | 2340.06     | -57.50                   |                          |



| Park                                            | Best-fit model       | F-value | P-value | adj. R <sup>2</sup> | Intercept | Temperature | Temperature <sup>2</sup> | Temperature <sup>3</sup> |
|-------------------------------------------------|----------------------|---------|---------|---------------------|-----------|-------------|--------------------------|--------------------------|
| Mount Rainier National Park                     | 2nd-order polynomial | 293.5   | <0.0001 | 0.98                | 28617.90  | -2907.66    | 1265.83                  |                          |
| Mount Rushmore National Memorial                | 3rd-order polynomial | 283.5   | <0.0001 | 0.99                | 16974.62  | 947.22      | 392.19                   | 22.90                    |
| Muir Woods National Monument                    | 1st-order polynomial | 55.4    | <0.0001 | 0.83                | -49191.81 | 10244.96    |                          |                          |
| Natchez National Historical Park                | 2nd-order polynomial | 7.9     | 0.0106  | 0.56                | -26166.54 | 4506.22     | -108.05                  |                          |
| Natchez Trace Parkway and National Scenic Trail | 2nd-order polynomial | 18.9    | 0.0006  | 0.76                | 505242.90 | 13033.37    | -265.39                  |                          |
| National Capital combined Park                  | 1st-order polynomial | 34      | 0.0002  | 0.75                | 105910.80 | 22592.40    |                          |                          |
| Natural Bridges National Monument               | 3rd-order polynomial | 102.6   | <0.0001 | 0.97                | 1459.30   | 459.90      | 77.98                    | -3.43                    |
| Navajo National Monument                        | 1st-order polynomial | 394.9   | <0.0001 | 0.97                | 1692.80   | 409.24      |                          |                          |
| New Bedford Whaling National Historical Park    | 3rd-order polynomial | 3.6     | 0.0661  | 0.41                | 850.00    | 8065.67     | -1137.05                 | 40.18                    |
| New River Gorge National River                  | 2nd-order polynomial | 58      | <0.0001 | 0.91                | 18983.62  | 1078.17     | 230.95                   |                          |
| Nez Perce National Historical Park              | 2nd-order polynomial | 95.7    | <0.0001 | 0.95                | 10516.51  | 539.66      | 19.92                    |                          |
| Nicodemus National Historic Site                | 2nd-order polynomial | 13.7    | 0.0019  | 0.7                 | 764.55    | -19.56      | 4.16                     |                          |
| Ninety Six National Historic Site               | 2nd-order polynomial | 17.9    | 0.0007  | 0.75                | -859.13   | 528.15      | -13.95                   |                          |
| Niobrara National Scenic River                  | 3rd-order polynomial | 89.8    | <0.0001 | 0.96                | 1512.62   | -61.67      | -38.55                   | 3.29                     |

| Park                                                              | Best-fit model       | F-value | P-value | adj. R <sup>2</sup> | Intercept  | Temperature | Temperature <sup>2</sup> | Temperature <sup>3</sup> |
|-------------------------------------------------------------------|----------------------|---------|---------|---------------------|------------|-------------|--------------------------|--------------------------|
| North Cascades National Park                                      | 2nd-order polynomial | 211.8   | <0.0001 | 0.97                | 2881.44    | 1373.89     | 264.31                   |                          |
| Obed Wild and Scenic River                                        | 1st-order polynomial | 25.5    | 0.0005  | 0.69                | 6391.28    | 669.28      |                          |                          |
| Ocmulgee National Monument                                        | 2nd-order polynomial | 3.8     | 0.065   | 0.33                | -5482.38   | 1897.01     | -49.09                   |                          |
| Olympic National Park                                             | 3rd-order polynomial | 68.9    | <0.0001 | 0.95                | -169292.10 | 113264.60   | -14829.97                | 727.70                   |
| Oregon Caves National Monument                                    | 3rd-order polynomial | 131.6   | <0.0001 | 0.97                | -2420.99   | 1437.30     | -139.85                  | 6.92                     |
| Organ Pipe Cactus National Monument                               | 1st-order polynomial | 10.5    | 0.0088  | 0.46                | 44654.17   | -1082.33    |                          |                          |
| Ozark National Scenic Riverway                                    | 3rd-order polynomial | 272.4   | <0.0001 | 0.99                | 6740.23    | 10841.44    | -871.05                  | 34.79                    |
| Padre Island National Seashore                                    | 1st-order polynomial | 25.8    | 0.0005  | 0.69                | -28204.52  | 3697.80     |                          |                          |
| Palo Alto Battlefield National Historic Site                      | 2nd-order polynomial | 15.9    | 0.0011  | 0.73                | -3733.34   | 708.90      | -17.76                   |                          |
| Pea Ridge National Military Park                                  | 2nd-order polynomial | 27.6    | 0.0001  | 0.83                | -40.38     | 785.03      | -13.06                   |                          |
| Pecos National Historic Park                                      | 1st-order polynomial | 244.3   | <0.0001 | 0.96                | 1621.03    | 229.23      |                          |                          |
| Pennsylvania Avenue National Historic Site National Historic Site | 1st-order polynomial | 21.8    | 0.0009  | 0.65                | 6661.81    | 870.30      |                          |                          |
| Perry's Victory and International Peace Memorial                  | 3rd-order polynomial | 163.2   | <0.0001 | 0.98                | 760.26     | 38.91       | -59.22                   | 6.55                     |
| Petersburg National Battlefield                                   | 1st-order polynomial | 15.4    | 0.0028  | 0.57                | 12756.70   | 763.45      |                          |                          |

| Park                                           | Best-fit model       | F-value | P-value | adj. R <sup>2</sup> | Intercept | Temperature | Temperature <sup>2</sup> | Temperature <sup>3</sup> |
|------------------------------------------------|----------------------|---------|---------|---------------------|-----------|-------------|--------------------------|--------------------------|
| Petrified Forest National Park                 | 2nd-order polynomial | 43.6    | <0.0001 | 0.89                | 20787.51  | 1137.54     | 110.81                   |                          |
| Petroglyph National Monument                   | 2nd-order polynomial | 11.6    | 0.0032  | 0.66                | 3837.69   | 737.35      | -24.70                   |                          |
| Pictured Rocks National Lakeshore              | 3rd-order polynomial | 34.6    | <0.0001 | 0.9                 | 11391.46  | -235.69     | 109.79                   | 9.14                     |
| Pinnacles National Monument                    | 2nd-order polynomial | 2.7     | 0.1232  | 0.23                | -39492.22 | 8825.81     | -329.06                  |                          |
| Pipe Spring National Monument                  | 3rd-order polynomial | 65.2    | <0.0001 | 0.95                | 1197.15   | 165.61      | 16.43                    | -0.66                    |
| Pipestone National Monument                    | 3rd-order polynomial | 137.6   | <0.0001 | 0.97                | 2146.47   | 83.71       | 5.82                     | 1.70                     |
| Piscataway Park                                | 2nd-order polynomial | 54.7    | <0.0001 | 0.91                | 2771.23   | 1414.03     | -30.46                   |                          |
| Point Reyes National Seashore                  | 1st-order polynomial | 36.7    | 0.0001  | 0.76                | 65674.33  | 7813.43     |                          |                          |
| President's Park                               | 1st-order polynomial | 10      | 0.0101  | 0.45                | 45860.88  | 2078.71     |                          |                          |
| Prince William Forest Park                     | 2nd-order polynomial | 41.1    | <0.0001 | 0.88                | 4009.86   | 2371.86     | -43.13                   |                          |
| Pu'uuhonua o Honaunau National Historical Park | Null                 |         |         |                     | 36108.03  |             |                          |                          |
| Puukohola Heiau National Historic Site         | Null                 |         |         |                     | 5686.58   |             |                          |                          |
| Rainbow Bridge National Monument               | 3rd-order polynomial | 173.5   | <0.0001 | 0.98                | 1126.07   | -277.08     | 121.99                   | -2.41                    |
| Redwood National Park                          | 3rd-order polynomial | 191.8   | <0.0001 | 0.98                | -41991.12 | 16526.90    | -1569.76                 | 58.50                    |
| Richmond National Battlefield Park             | 2nd-order polynomial | 23.5    | 0.0003  | 0.8                 | 4178.22   | 1405.91     | -29.69                   |                          |

| Park                                            | Best-fit model       | F-value | P-value | adj. R <sup>2</sup> | Intercept | Temperature | Temperature <sup>2</sup> | Temperature <sup>3</sup> |
|-------------------------------------------------|----------------------|---------|---------|---------------------|-----------|-------------|--------------------------|--------------------------|
| Rock Creek Park Park                            | 2nd-order polynomial | 362.1   | <0.0001 | 0.98                | 88326.53  | 2715.64     | 126.89                   |                          |
| Rocky Mountain National Park                    | 2nd-order polynomial | 220.9   | <0.0001 | 0.98                | 100771.10 | 19179.80    | 1706.51                  |                          |
| Roger Williams National Memorial                | 3rd-order polynomial | 105.2   | <0.0001 | 0.97                | 974.90    | 24.89       | 38.97                    | -1.42                    |
| Ross Lake National Recreation Area              | 2nd-order polynomial | 267.7   | <0.0001 | 0.98                | 6130.08   | 2598.83     | 355.45                   |                          |
| Russell Cave National Monument                  | 2nd-order polynomial | 42      | <0.0001 | 0.88                | -501.66   | 292.18      | -6.38                    |                          |
| Sagamore Hill National Historic Site            | 3rd-order polynomial | 41      | <0.0001 | 0.92                | 2267.62   | 883.81      | -62.25                   | 1.76                     |
| Saguaro National Park                           | 1st-order polynomial | 9.7     | 0.011   | 0.44                | 93178.91  | -1882.39    |                          |                          |
| Saint Croix National Scenic River               | 3rd-order polynomial | 173.3   | <0.0001 | 0.98                | 5643.28   | 500.79      | 67.73                    | 5.97                     |
| Saint Paul's Church National Historic Site      | Null                 |         |         |                     | 882.16    |             |                          |                          |
| Saint-Gaudens National Historic Site            | 2nd-order polynomial | 28.1    | 0.0001  | 0.83                | 300.01    | 113.98      | 13.14                    |                          |
| Salem Maritime National Historic Site           | 1st-order polynomial | 16.9    | 0.0021  | 0.59                | 19370.98  | 4000.82     |                          |                          |
| Salinas Pueblo Missions National Monument       | 2nd-order polynomial | 70.1    | <0.0001 | 0.93                | 1015.77   | 311.03      | -8.52                    |                          |
| San Antonio Missions National Historic Park     | 1st-order polynomial | 24.5    | 0.0006  | 0.68                | 35385.09  | 1859.97     |                          |                          |
| San Francisco Maritime National Historical Park | 1st-order polynomial | 13.5    | 0.0042  | 0.53                | -59807.10 | 26138.46    |                          |                          |

| Park                                            | Best-fit model       | F-value | P-value | adj. R <sup>2</sup> | Intercept  | Temperature | Temperature <sup>2</sup> | Temperature <sup>3</sup> |
|-------------------------------------------------|----------------------|---------|---------|---------------------|------------|-------------|--------------------------|--------------------------|
| San Juan Island National Historical Park        | Null                 |         |         |                     | 122752.20  |             |                          |                          |
| San Juan National Historical Site               | 3rd-order polynomial | 12.7    | 0.0021  | 0.76                | #####      | 2320576.00  | -101316.30               | 1474.31                  |
| Santa Monica Mountains National Recreation Area | 2nd-order polynomial | 2.9     | 0.1079  | 0.25                | -246855.00 | 38866.54    | -1250.72                 |                          |
| Saratoga National Historical Park               | 2nd-order polynomial | 75.4    | <0.0001 | 0.93                | 4185.60    | 500.07      | 12.41                    |                          |
| Saugus Iron Works National Historic Site        | 2nd-order polynomial | 191     | <0.0001 | 0.97                | 780.18     | 113.06      | 2.71                     |                          |
| Scotts Bluff National Monument                  | 2nd-order polynomial | 120.2   | <0.0001 | 0.96                | 4014.47    | 292.71      | 28.60                    |                          |
| Sequoia National Park                           | 2nd-order polynomial | 157.1   | <0.0001 | 0.97                | 22717.88   | 2173.63     | 339.01                   |                          |
| Shenandoah National Park                        | 1st-order polynomial | 16.9    | 0.0021  | 0.59                | 20097.59   | 8449.43     |                          |                          |
| Shiloh National Battlefield                     | 2nd-order polynomial | 17.8    | 0.0007  | 0.75                | 4167.83    | 2901.51     | -64.99                   |                          |
| Sitka National Historical Park                  | 2nd-order polynomial | 127.9   | <0.0001 | 0.96                | 3951.18    | 242.46      | 279.96                   |                          |
| Sleeping Bear Dunes National Lakeshore          | 3rd-order polynomial | 43.5    | <0.0001 | 0.92                | 26645.08   | -1963.04    | -399.82                  | 62.93                    |
| Springfield Armory National Historic Site       | 2nd-order polynomial | 35.9    | <0.0001 | 0.86                | 996.41     | 24.26       | 1.94                     |                          |
| Statue Of Liberty National Monument             | 3rd-order polynomial | 58.8    | <0.0001 | 0.94                | 100745.00  | 27548.07    | -1894.20                 | 58.28                    |
| Steamtown National Historic Site                | 1st-order polynomial | 29.4    | 0.0003  | 0.72                | 3883.19    | 706.67      |                          |                          |

| Park                                                 | Best-fit model       | F-value | P-value | adj. R <sup>2</sup> | Intercept | Temperature | Temperature <sup>2</sup> | Temperature <sup>3</sup> |
|------------------------------------------------------|----------------------|---------|---------|---------------------|-----------|-------------|--------------------------|--------------------------|
| Stones River National Battlefield                    | 2nd-order polynomial | 25.6    | 0.0002  | 0.82                | 5624.22   | 1069.82     | -19.32                   |                          |
| Sunset Crater Volcano National Monument              | 2nd-order polynomial | 89      | <0.0001 | 0.94                | 10368.14  | 2231.34     | -33.31                   |                          |
| Tallgrass Prairie National Preserve                  | 3rd-order polynomial | 20.7    | 0.0004  | 0.84                | 398.96    | -75.92      | 21.40                    | -0.59                    |
| Theodore Roosevelt Birthplace National Historic Site | 2nd-order polynomial | 5.9     | 0.023   | 0.47                | 1112.23   | 61.08       | -2.51                    |                          |
| Theodore Roosevelt Inaugural National Historic Site  | Null                 |         |         |                     | 1692.20   |             |                          |                          |
| Theodore Roosevelt Island National Memorial          | 2nd-order polynomial | 432.2   | <0.0001 | 0.99                | 3662.57   | 429.68      | -4.94                    |                          |
| Theodore Roosevelt National Park                     | 3rd-order polynomial | 257     | <0.0001 | 0.99                | 11211.54  | 1133.72     | 66.74                    | 5.84                     |
| Thomas Jefferson Memorial National Memorial          | 2nd-order polynomial | 5.1     | 0.0323  | 0.43                | 1583.99   | 19128.95    | -467.31                  |                          |
| Timpanogos Cave National Monument                    | 2nd-order polynomial | 244.1   | <0.0001 | 0.98                | -518.15   | -229.99     | 73.17                    |                          |
| Timucaun Ecological and Historical Preserve          | 1st-order polynomial | 10.7    | 0.0085  | 0.47                | 27915.40  | 1323.47     |                          |                          |
| Tonto National Monument                              | 1st-order polynomial | 6.6     | 0.0276  | 0.34                | 9481.79   | -221.74     |                          |                          |
| Tumacacori National Historical Park                  | 1st-order polynomial | 22.5    | 0.0008  | 0.66                | 9918.25   | -320.34     |                          |                          |
| Tuskegee Airmen National Historic Site               | Null                 |         |         |                     | 2180.07   |             |                          |                          |
| Tuskegee Institute National Historical Site          | Null                 |         |         |                     | 12939.95  |             |                          |                          |

| Park                                         | Best-fit model       | F-value | P-value | adj. R <sup>2</sup> | Intercept | Temperature | Temperature <sup>2</sup> | Temperature <sup>3</sup> |
|----------------------------------------------|----------------------|---------|---------|---------------------|-----------|-------------|--------------------------|--------------------------|
| Tuzigoot National Monument                   | 3rd-order polynomial | 7.1     | 0.0119  | 0.63                | -8654.92  | 3520.36     | -199.79                  | 3.48                     |
| Ulysses S. Grant National Historic Site      | 2nd-order polynomial | 152.3   | <0.0001 | 0.96                | 442.16    | 51.84       | 2.54                     |                          |
| Upper Delaware Scenic and Recreational River | 3rd-order polynomial | 141     | <0.0001 | 0.97                | 1659.23   | -63.65      | 27.93                    | 5.47                     |
| Valley Forge National Historical Park        | 1st-order polynomial | 75.9    | <0.0001 | 0.87                | 116206.40 | 6056.73     |                          |                          |
| Vanderbilt Mansion National Historic Site    | 3rd-order polynomial | 44.4    | <0.0001 | 0.92                | 13425.03  | 1840.06     | 107.32                   | -5.32                    |
| Vicksburg National Military Park             | 2nd-order polynomial | 9.7     | 0.0057  | 0.61                | -19891.54 | 8036.45     | -160.14                  |                          |
| Vietnam Veterans Memorial National Memorial  | 2nd-order polynomial | 10.4    | 0.0046  | 0.63                | 4444.48   | 37182.40    | -954.45                  |                          |
| Virgin Islands National Park                 | 1st-order polynomial | 19.9    | 0.0012  | 0.63                | 326478.90 | -10588.91   |                          |                          |
| Voyageurs National Park                      | 2nd-order polynomial | 97.9    | <0.0001 | 0.95                | 3210.53   | 753.12      | 88.28                    |                          |
| Walnut Canyon National Monument              | 2nd-order polynomial | 42.6    | <0.0001 | 0.88                | 3387.90   | 963.03      | -17.92                   |                          |
| War in the Pacific National Historical Park  | 1st-order polynomial | 2.5     | 0.1418  | 0.12                | 66259.10  | -2014.50    |                          |                          |
| Washita Battlefield National Historic Site   | 2nd-order polynomial | 28.9    | 0.0001  | 0.84                | 215.26    | 86.29       | -1.53                    |                          |
| Weir Farm National Historic Site             | 2nd-order polynomial | 37.9    | <0.0001 | 0.87                | 542.66    | 94.57       | -1.91                    |                          |
| Whiskeytown National Recreation Area         | 1st-order polynomial | 60.9    | <0.0001 | 0.84                | -13713.15 | 8766.17     |                          |                          |

| Park                                                                  | Best-fit model       | F-value | P-value | adj. R <sup>2</sup> | Intercept | Temperature | Temperature <sup>2</sup> | Temperature <sup>3</sup> |
|-----------------------------------------------------------------------|----------------------|---------|---------|---------------------|-----------|-------------|--------------------------|--------------------------|
| White Sands National Monument                                         | 1st-order polynomial | 12.6    | 0.0052  | 0.51                | 21297.28  | 1387.50     |                          |                          |
| Whitman Mission National Historic Site                                | 2nd-order polynomial | 23.7    | 0.0003  | 0.8                 | 969.67    | 774.31      | -17.60                   |                          |
| William Howard Taft National Historic Site                            | 1st-order polynomial | 17.3    | 0.002   | 0.6                 | 647.61    | 14.25       |                          |                          |
| Wilson's Creek National Battlefield                                   | 1st-order polynomial | 97.2    | <0.0001 | 0.9                 | 5287.34   | 670.60      |                          |                          |
| Wind Cave National Park                                               | 3rd-order polynomial | 282.9   | <0.0001 | 0.99                | 13630.94  | 591.82      | 88.55                    | 6.85                     |
| Wolf Trap National Park for the Performing Arts                       | 3rd-order polynomial | 369.2   | <0.0001 | 0.99                | -4907.44  | 4526.01     | -708.71                  | 30.09                    |
| Women's Rights National Historical Park                               | 3rd-order polynomial | 34.8    | <0.0001 | 0.9                 | 1183.69   | 115.37      | -22.49                   | 1.21                     |
| World War II Memorial National Memorial                               | 2nd-order polynomial | 17.4    | 0.0008  | 0.75                | -36291.07 | 54315.87    | -1405.10                 |                          |
| World War II Valor in the Pacific National Monument National Monument | 3rd-order polynomial | 6.9     | 0.0134  | 0.61                | #####     | 210087.00   | -11708.34                | 215.86                   |
| Wrangell-St. Elias National Park & Preserve                           | 2nd-order polynomial | 56.2    | <0.0001 | 0.91                | 3706.63   | 737.59      | 32.15                    |                          |
| Wright Brothers National Memorial                                     | 3rd-order polynomial | 54.6    | <0.0001 | 0.94                | -47611.92 | 13256.05    | -843.65                  | 20.25                    |
| Wupatki National Monument                                             | 2nd-order polynomial | 133.6   | <0.0001 | 0.96                | 3073.87   | 1655.21     | -22.72                   |                          |
| Yellowstone National Park                                             | 2nd-order polynomial | 513.5   | <0.0001 | 0.99                | 39434.98  | 16394.33    | 2024.93                  |                          |
| Yosemite National Park                                                | 2nd-order polynomial | 568.9   | <0.0001 | 0.99                | 78160.87  | 19801.66    | 303.27                   |                          |



| Park               | Best-fit model          | F-value | P-value | adj. R <sup>2</sup> | Intercept | Temperature | Temperature <sup>2</sup> | Temperature <sup>3</sup> |
|--------------------|-------------------------|---------|---------|---------------------|-----------|-------------|--------------------------|--------------------------|
| Zion National Park | 2nd-order<br>polynomial | 314.5   | <0.0001 | 0.98                | 39992.28  | 16627.52    | -170.31                  |                          |
